# Supplementary material for: The conjugates of 5′-deoxy-5-fluorocytidine and hydroxycinnamic acids – synthesis, anti-pancreatic cancer activity and molecular docking studies
Source: Royal Society of Chemistry journal article supplement (doi:10.1039/d4ra01683a), 2024-01-01
Supplement: d4ra01683a1.pdf [file d4ra01683a1.pdf]

## Supporting Information

### The conjugates of 5'-deoxy-5-fluorocytidine and hydroxycinnamic acids - synthesis, anti-pancreatic cancer activity and molecular docking studies

Marcin Cybulski, <sup>a</sup> Magdalena Zaremba-Czogalla, <sup>b</sup> Bartosz Trzaskowski, <sup>c</sup> Marek Kubiszewski, <sup>d</sup> Joanna Tobiasz, <sup>a</sup> Anna Jaromin, <sup>b</sup> Piotr Krzeczynski, <sup>a</sup> Jerzy Gubernator <sup>b</sup> and Olga Michalak\*, <sup>a</sup>

<sup>a</sup> Pharmacy, Cosmetic Chemistry and Biotechnology Research Group, Łukasiewicz-Industrial Chemistry Institute, Rydygiera 8, 01-793 Warsaw, Poland.

<sup>b</sup> Department of Lipids and Liposomes, Faculty of Biotechnology, University of Wrocław, Fryderyka Joliot-Curie 14a, 50-383 Wrocław, Poland.

<sup>c</sup> Chemical and Biological Systems Simulation Lab, Center of New Technologies, University of Warsaw, Banacha 2c, 02-097 Warsaw, Poland.

<sup>d</sup> Pharmaceutical Analysis Laboratory, Łukasiewicz Research Network-Industrial Chemistry Institute, Rydygiera 8, 01-793 Warsaw, Poland.

\* Correspondence: Łukasiewicz-Industrial Chemistry Institute, Rydygiera 8, 01-793 Warsaw, Poland; [olga.michalak@ichp.lukasiewicz.gov.pl](mailto:olga.michalak@ichp.lukasiewicz.gov.pl)

| Table of contents |                                                                                                                                              |
|-------------------|----------------------------------------------------------------------------------------------------------------------------------------------|
| <b>1</b>          | <b>Table S1.</b> Predicted selected ADMET properties of the tested compounds.                                                                |
| <b>2</b>          | <b>Table S2.</b> Predicted selected ADMET properties of the tested compounds, cont.                                                          |
| <b>3</b>          | (3,4-diallyloxy)cinnamic acid ( <b>18</b> ) - preparation                                                                                    |
| <b>4</b>          | 5'-deoxy-5-fluoro-2',3'-O-isopropylidene-N <sup>4</sup> , N <sup>4</sup> -(bis(3,4-diallyloxy)cinnamoyl)cytidine ( <b>26</b> ) - preparation |
| <b>5</b>          | 5'-deoxy-5-fluoro-2',3'-O-isopropylidene-N <sup>4</sup> -(3,4-diallyloxy)cinnamoyl)cytidine ( <b>28</b> ) - preparation                      |
| <b>6</b>          | 5'-deoxy-5-fluoro-N <sup>4</sup> -(3,4-diallyloxy)cinnamoyl)cytidine ( <b>29</b> ) - preparation                                             |
| <b>7</b>          | <sup>1</sup> H and <sup>13</sup> C spectra                                                                                                   |
| <b>8</b>          | HRMS spectra of compounds <b>1-6</b>                                                                                                         |

**Table S1.** Predicted selected ADMET properties of the tested compounds.

| compound             | MW <sup>a</sup> | dipole <sup>b</sup> | vol <sup>c</sup> | SASA <sup>d</sup> | dHB <sup>e</sup> | aHB <sup>f</sup> | logP <sup>g</sup> | logS <sup>h</sup> | metab <sup>i</sup> | P <sup>j</sup> | Ro3 <sup>k</sup> | Ro5 <sup>l</sup> |
|----------------------|-----------------|---------------------|------------------|-------------------|------------------|------------------|-------------------|-------------------|--------------------|----------------|------------------|------------------|
| <b>1</b>             | 517.5           | 2.54                | 1540.4           | 857.6             | 1                | 14.2             | 1.6               | -5.3              | 1                  | 68.8           | 0                | 2                |
| <b>2</b>             | 517.5           | 7.06                | 1539.8           | 853.2             | 1                | 14.2             | 1.8               | -5.3              | 1                  | 97.3           | 0                | 2                |
| <b>3</b>             | 517.5           | 4.88                | 1541.0           | 863.3             | 1                | 14.2             | 1.6               | -5.4              | 1                  | 69.3           | 0                | 2                |
| <b>4</b>             | 575.5           | 4.88                | 1683.2           | 928.9             | 1                | 16.7             | 1.1               | -5.3              | 1                  | 29.8           | 0                | 2                |
| <b>5</b>             | 575.5           | 4.61                | 1687.0           | 928.8             | 1                | 16.7             | 1.1               | -5.3              | 1                  | 31.1           | 0                | 2                |
| <b>6</b>             | 491.4           | 5.21                | 1423.3           | 792.5             | 3                | 13.2             | 1.0               | -4.9              | 3                  | 25.5           | 0                | 1                |
| <b>30</b>            | 491.4           | 9.36                | 1441.2           | 811.6             | 3                | 16.1             | -0.1              | -4.3              | 3                  | 23.8           | 0                | 1                |
| <b>31</b>            | 407.4           | 9.58                | 1178.2           | 678.8             | 5                | 12.6             | -0.5              | -3.5              | 5                  | 16.9           | 1                | 0                |
| <b>32</b>            | 633.5           | 4.79                | 1832.0           | 997.0             | 1                | 19.2             | 0.7               | -5.3              | 1                  | 16.9           | 1                | 2                |
| <b>33</b>            | 507.4           | 6.92                | 1470.2           | 832.5             | 4                | 14.0             | 0.3               | -5.1              | 4                  | 5.6            | 1                | 2                |
| <b>34</b>            | 423.4           | 6.09                | 1199.7           | 694.7             | 6                | 13.4             | -1.2              | -3.4              | 6                  | 5.1            | 1                | 2                |
| <b>5-dFCR</b>        | 245.2           | 5.85                | 691.2            | 416.1             | 4                | 9.1              | -1.4              | -1.8              | 3                  | 80.6           | 0                | 0                |
| <b>benazepril</b>    | 424.5           | 3.78                | 1360.8           | 744.9             | 2                | 8.5              | 1.7               | -4.7              | 7                  | 30.8           | 1                | 0                |
| <b>capecitabine</b>  | 373.4           | 7.50                | 1107.9           | 635.8             | 3                | 11.1             | 0.3               | -3.2              | 3                  | 93.3           | 0                | 0                |
| <b>cis-ermethrin</b> | 391.3           | 2.61                | 1150.2           | 611.5             | 0                | 2.5              | 6.0               | -5.9              | 2                  | 5009           | 1                | 1                |
| <b>irinotecan</b>    | 586.7           | 13.88               | 1780.8           | 952.1             | 1                | 12.8             | 3.4               | -6.7              | 4                  | 50.6           | 1                | 1                |

<sup>a</sup>MW – molecular weight (Da); <sup>b</sup>dipole – dipole moment (D); <sup>c</sup>vol – total molecular volume (Å<sup>3</sup>); <sup>d</sup>SASA – solvent accessible surface (Å<sup>2</sup>); <sup>e</sup>dHB – estimated number of hydrogen bonds that would be donated by the solute to water molecules in an aqueous solution; <sup>f</sup>aHB – estimated number of hydrogen bonds that would be accepted by the solute from water molecules in an aqueous solution; <sup>g</sup>logP – octanol/water partition coefficient; <sup>h</sup>logS – predicted aqueous solubility (mol/dm<sup>3</sup>); <sup>i</sup>metab – number of likely metabolic reactions; <sup>j</sup>P – apparent Caco-2 permeability (nm/sec); <sup>k</sup>Ro3 – number of violations of Jorgensen's rule of three; <sup>l</sup>Ro5 – number of violations of Lipinski's rule of five.

**Table S2.** Predicted selected ADMET properties of the tested compounds, cont.

| compound       | FOSA <sup>a</sup> | FISA <sup>b</sup> | PISA <sup>c</sup> | glob <sup>d</sup> | HERG <sup>e</sup> | BB <sup>f</sup> | MDCK <sup>g</sup> | K <sub>p</sub> <sup>h</sup> | HSA <sup>i</sup> | J <sub>m</sub> <sup>j</sup> | LD <sub>50</sub> <sup>k</sup> |
|----------------|-------------------|-------------------|-------------------|-------------------|-------------------|-----------------|-------------------|-----------------------------|------------------|-----------------------------|-------------------------------|
| 1              | 406.9             | 227.6             | 191.2             | 0.75              | -6.5              | -2.5            | 41.0              | -4.4                        | -0.5             | 0.000                       | 5000                          |
| 2              | 388.6             | 211.7             | 210.9             | 0.76              | -6.5              | -2.2            | 67.7              | -4.0                        | -0.5             | 0.000                       | 5000                          |
| 3              | 415.2             | 227.3             | 187.5             | 0.75              | -6.5              | -2.5            | 42.1              | -4.4                        | -0.5             | 0.000                       | 5000                          |
| 4              | 488.2             | 265.9             | 142.9             | 0.74              | -6.5              | -3.1            | 16.6              | -5.1                        | -0.7             | 0.000                       | 5000                          |
| 5              | 486.5             | 264.0             | 146.5             | 0.74              | -6.5              | -3.1            | 17.3              | -5.1                        | -0.7             | 0.000                       | 5000                          |
| 6              | 296.6             | 273.0             | 181.0             | 0.77              | -6.1              | -2.9            | 15.9              | -5.1                        | -0.4             | 0.000                       | 5000                          |
| 30             | 339.4             | 276.3             | 153.9             | 0.76              | -6.1              | -3.0            | 14.7              | -5.3                        | -0.9             | 0.000                       | 1000                          |
| 31             | 162.5             | 291.8             | 182.5             | 0.79              | -5.7              | -2.9            | 10.2              | -5.5                        | -0.8             | 0.000                       | 1000                          |
| 32             | 558.8             | 292.0             | 113.3             | 0.73              | -6.5              | -3.6            | 9.1               | -5.6                        | -0.9             | 0.000                       | 5000                          |
| 33             | 308.1             | 342.4             | 149.0             | 0.75              | -6.3              | -3.9            | 2.8               | -6.4                        | -0.5             | 0.000                       | 5000                          |
| 34             | 161.8             | 346.3             | 153.5             | 0.79              | -5.7              | -3.6            | 2.5               | -6.5                        | -0.9             | 0.000                       | 1000                          |
| 5-dFCR         | 122.9             | 220.3             | 28.6              | 0.91              | -3.1              | -1.3            | 56.8              | -5.2                        | -0.8             | 0.025                       | 3390                          |
| benazepril     | 282.7             | 137.9             | 324.4             | 0.80              | -5.3              | -1.0            | 16.2              | -4.1                        | 0.1              | 0.001                       | 4019                          |
| capecitabine   | 350.6             | 213.6             | 27.3              | 0.81              | -4.7              | -2.0            | 66.5              | -4.6                        | -0.7             | 0.007                       | 1000                          |
| cis-permethrin | 201.9             | 31.2              | 293.7             | 0.87              | -5.1              | 0.1             | 8214.0            | -0.5                        | 1.0              | 0.166                       | 85                            |
| irinotecan     | 638.0             | 178.0             | 136.1             | 0.75              | -7.0              | -1.4            | 21.8              | -6.0                        | 0.6              | 0.000                       | 765                           |

<sup>a</sup>FOSA – hydrophobic component of the SASA; <sup>b</sup>FISA – hydrophilic component of the SASA; <sup>c</sup>PISA –  $\pi$  (carbon and attached hydrogen) component of the SASA; <sup>d</sup>glob – globularity descriptor; <sup>e</sup>HERG – predicted IC<sub>50</sub> value for blockage of HERG K<sup>+</sup> channels; <sup>f</sup>BB – predicted brain/blood partition coefficient; <sup>g</sup>MDCK – predicted apparent MDCK cell permeability (nm/sec); <sup>h</sup>K<sub>p</sub> – predicted skin permeability; <sup>i</sup>HSA – prediction of binding to human serum albumin; <sup>j</sup>J<sub>m</sub> – Predicted maximum transdermal transport rate ( $\mu\text{g cm}^{-2} \text{hr}^{-1}$ ); <sup>k</sup>LD<sub>50</sub> – predicted value of median lethal dose (mg/kg).

(3,4-diallyloxy)cinnamic acid (**18**)

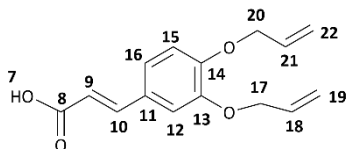

Methyl ester **12** [1] (1.00 g, 5.15 mM) was dissolved in acetone (30 mL), then K<sub>2</sub>CO<sub>3</sub> (2.84, 20.60 mM) and allyl bromide (2.49 g, 20.60 mM) were added. The mixture was stirred overnight at ambient temperature. The inorganic salts were filtered off, and solvents were evaporated to oily residue. Then, methanol (10 mL) was added, followed by the addition of a NaOH (0.41 g, 10.30 mM) solution in water (5 mL). After stirring in r.t. for 1 h, the mixture was diluted with water (100 mL) and washed twice with methylene chloride. The aqueous layer was acidified to pH 1 with conc. HCl aq. The product was extracted with methylene chloride (3x30 mL). The combined organic layers were dried under anhydrous MgSO<sub>4</sub>, evaporated, and dried *in vacuo* to give **18** as white solid. Yield 1.19 g (89%); m.p. 161.7°C (159-160°C [2]); <sup>1</sup>H NMR (500 MHz, CDCl<sub>3</sub>)  $\delta$  7.71 (d, 1H, *J* = 15.8 Hz, H-10), 7.13-7.08 (m, 2H, H-12, H-16), 6.88 (d, 1H, *J* = 8.1 Hz, H-15), 6.28 (d, 1H, *J* = 15.8 Hz, H-9), 6.14-6.02 (m, 2H, H-18, H-21), 5.47-5.40 (m, 2H, H-19, H-22), 5.34-5.28 (m, 2H, H-19, H-22), 4.67-4.62 (m, 4H, H-17, H-20). <sup>13</sup>C NMR (125 MHz, CDCl<sub>3</sub>)  $\delta$  172.6 (C-8), 151.0 (C-14), 148.6 (C-13), 146.9 (C-10), 133.0 (C-18), 132.8 (C-21), 127.1 (C-11), 123.1 (C-16), 118.0 (C-22), 117.9 (C-19), 114.9 (C-9), 113.3 (C-12), 112.8 (C-15), 69.9 (C-17), 69.7 (C-20); HRMS (ESI, *m/z*): calculated for C<sub>15</sub>H<sub>17</sub>O<sub>4</sub> [M + H]<sup>+</sup> 261.1127; found 261.1139, calculated for C<sub>15</sub>H<sub>16</sub>O<sub>4</sub>Na [M + Na]<sup>+</sup> 283.0946; found 283.0951.

5'-deoxy-5-fluoro-2',3'-O-isopropylidene-N<sup>4</sup>, N<sup>4</sup>-(bis(3,4-diallyloxy)cinnamoyl)cytidine (**26**)

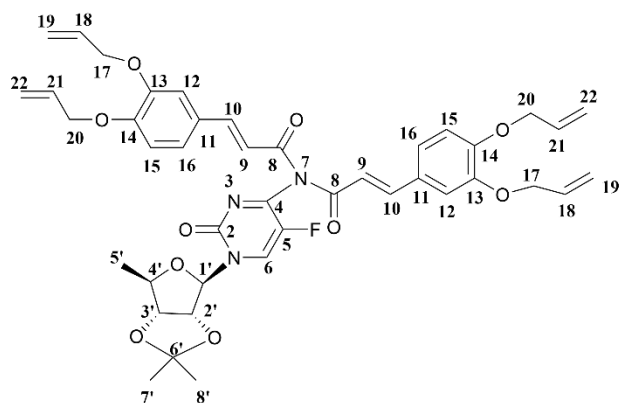

5'-deoxy-5-fluoro-2',3'-O-isopropylidencytidine (**27**) (0.110 g, 0.386 mM) and 3,4-di-O-allylcaffeic acid (**17**) (0.100 g, 0.39 mM) were dissolved in dry pyridine (2 mL) and cooled to  $-25^{\circ}\text{C}$ . To the stirred on an ice-salt bath solution the  $\text{POCl}_3$  (0.04 mL) was added dropwise over a period of 5 min. with the temperature kept below  $-20^{\circ}\text{C}$ . The reaction was stirred 4 hours at  $-20^{\circ}\text{C}$ , then it was allowed to reach ambient temperature and stirred overnight. After extraction by water/methylene chloride system, the separated organic layer was dried over anhydrous  $\text{MgSO}_4$ , and the solvent was distilled off under reduced pressure. The crude oil was purified using flash column chromatography on a silica gel with hexanes: ethyl acetate 3:1 to 1:1 (v/v), to give two main products: monosubstituted **28** with the yield of 0.067 g (33% ) as a yellow solid and disubstituted **26** as a yellow solid. Yield of **26** 0.016 g (5.4%); m.p.  $83^{\circ}\text{C}$  (dec.);  $^1\text{H}$  NMR (500 MHz,  $\text{CDCl}_3$ )  $\delta$  7.87 (d, 1H,  $J$  = 4.9 Hz, H-6, double bond in flucytosine ring), 7.78 (d, 2H,  $J$  = 15.4 Hz, H-10, double bond), 7.12 (dd, 2H,  $J_1$  = 8.4 Hz,  $J_2$  = 1.9 Hz, H-16, aromatic CA), 7.05 (d, 2H,  $J$  = 1.9 Hz, H-12, aromatic CA), 6.86 (d, 2H,  $J$  = 8.4 Hz, H-15, aromatic CA), 6.61 (d, 2H,  $J$  = 15.4 Hz, H-9, double bond), 6.11-6.00 (m, 4H, H-18, H-21, allyl CH), 5.78 (d, 1H,  $J$  = 1.6 Hz, H-1', deoxyribose), 5.46-5.39 (m, 4H, H-19, H-22, allyl  $\text{CH}_2$ ), 5.33-5.25 (m, 4H, H-19, H-22, allyl  $\text{CH}_2$ ), 4.96 (dd, 1H,  $J_1$  = 6.3 Hz,  $J_2$  = 1.8 Hz, H-2', deoxyribose), 4.64 (m, 4H, H-20,  $\text{CH}_2$ ), 4.59 (m, 4H, H-17,  $\text{CH}_2$ ), 4.51 (dd, 1H,  $J_1$  = 6.3 Hz,  $J_2$  = 4.1 Hz, H-3', deoxyribose), 4.42 (dq, 1H,  $J_1$  = 6.6 Hz,  $J_2$  = 4.1 Hz, H-4', deoxyribose), 1.58 (s, 3H, H-7' or H-8', isopropylidene  $\text{CH}_3$ ), 1.43 (d,  $J$  = 6.6 Hz, 3H, H-5', deoxyribose  $\text{CH}_3$ ), 1.36 (s, 3H, H-7' or H-8', isopropylidene  $\text{CH}_3$ );  $^{13}\text{C}$  NMR (125 MHz,  $\text{CDCl}_3$ )  $\delta$  167.3 (C-8, C=O CA), 157.3 (d,  $J_{\text{CF}}$  = 13.4 Hz, C-4, flucytosine ring), 152.4 (C-2, C=O flucytosine ring), 151.4 (C-14, aromatic CA), 148.5 (C-13, aromatic CA), 146.7 (C-10, double bond), 140.4 (d,  $J_{\text{CF}}$  = 247.7 Hz, C-5, flucytosine ring), 133.0 (C-18, allyl CH), 132.7 (C-21, allyl CH), 130.6 (d,  $J_{\text{CF}}$  = 34.1 Hz, C-6, flucytosine ring), 127.3 (C-11, aromatic CA), 123.5 (C-16, aromatic CA), 118.1 (C-22, allyl  $\text{CH}_2$ ), 118.1 (C-19, allyl  $\text{CH}_2$ ), 117.3 (C-9, double bond), 114.6 (C-6', isopropylidene), 113.5 (C-12, aromatic CA), 113.3 (C-15, aromatic CA), 94.7 (C-1', deoxyribose), 85.6 (C-2', deoxyribose), 84.6 (C-3', deoxyribose), 84.3 (C-4', deoxyribose), 70.1 (C-17,  $\text{CH}_2$ ), 69.7 (C-20,  $\text{CH}_2$ ), 27.1 (C-7' or C-8', isopropylidene  $\text{CH}_3$ ), 25.3 (C-7' or C-8', isopropylidene  $\text{CH}_3$ ), 19.3 (C-5', deoxyribose  $\text{CH}_3$ ); HRMS (ESI, m/z): calculated for  $\text{C}_{42}\text{H}_{45}\text{N}_3\text{O}_{10}\text{F}$   $[\text{M} + \text{H}]^+$  770.3089; found 770.3081, calculated for  $\text{C}_{42}\text{H}_{44}\text{N}_3\text{O}_{10}\text{FNa}$   $[\text{M} + \text{Na}]^+$  792.2908; found 792.2902.

5'-deoxy-5-fluoro-2',3'-O-isopropylidene-N<sup>4</sup>-(3,4-diallyloxy)cinnamoyl)cytidine (**28**)

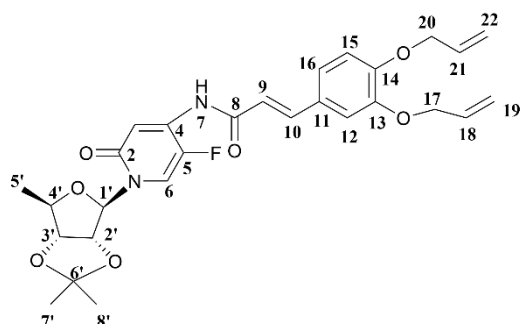

To 5'-deoxy-5-fluoro-2',3'-O-isopropylidencytidine (**27**) (1.10 g, 3.86 mmol) in methylene chloride (4 mL), 50% NaOH (0.925 g; 11.57 mM) was added. Then, after 1 min. stirring in ambient temperature, the solution (3,4-diallyloxy)cinnamoyl chloride (**24**) (1.08, 3.86 mM) in methylene chloride (6 mL) was added dropwise. The reaction mixture was heated with stirring for 1 h at  $50^{\circ}\text{C}$ . After cooling, it was extracted with water/methylene chloride. The separated organic layer was dried over anhydrous  $\text{MgSO}_4$ , and the solvent was distilled off under reduced pressure. The crude product **28** was purified by flash column chromatography on a silica gel with hexanes: ethyl acetate 4:1 to 1:1 (v/v). Yield 1.85 g (91%); m.p.  $85^{\circ}\text{C}$  (dec.);  $^1\text{H}$  NMR (500 MHz,  $\text{CDCl}_3$ )  $\delta$  7.82 (d, 1H,  $J$  = 15.6 Hz, H-10, double bond), 7.56 (bs, 1H, H-7, NH), 7.22-7.12 (m, 2H, H-12, H-16, aromatic CA), 6.87 (d, 1H,  $J$  = 8.3 Hz, H-15, aromatic CA), 6.15-6.00 (m, 2H, H-18, H-21, allyl CH), 5.67 (s, 1H, H-1', CHN deoxyribose), 5.55-5.38 (d, 2H,  $J$  = 15.3 Hz, H-19, H-22, allyl  $\text{CH}_2$ ), 5.30 (d, 2H,  $J$  = 10.5 Hz, H-19, H-22, allyl  $\text{CH}_2$ ), 4.92 (d, 1H,  $J$

= 5.5 Hz, H-2', deoxyribose), 4.65 (d, 4H,  $J = 4.5$  Hz, H-17, H-20, CH<sub>2</sub>), 4.51 (dd, 1H,  $J_1 = J_2 = 4.6$  Hz, H-3', deoxyribose), 4.31 (m, 1H, H-4', deoxyribose), 1.57 (s, 3H, H-7' or H-8', isopropylidene CH<sub>3</sub>), 1.41 (d, 3H,  $J = 6.5$  Hz, H-5', deoxyribose CH<sub>3</sub>), 1.34 (s, 3H, H-7' or H-8', isopropylidene CH<sub>3</sub>); <sup>13</sup>C NMR (125 MHz, CDCl<sub>3</sub>) δ 150.9 (C-14, aromatic CA), 148.5 (C-13, aromatic CA), 146.0 (C-10, double bond), 133.0 (C-18, allyl CH), 132.9 (C-21, allyl CH), 127.8 (C-11, aromatic CA), 123.3 (C-16, aromatic CA), 118.0 (C-19, C-22, allyl CH<sub>2</sub>), 114.7 (C-6', isopropylidene), 113.3 (C-15, aromatic CA), 113.1 (C-12, aromatic CA), 93.9 (C-1', deoxyribose), 85.3 (C-2', deoxyribose), 84.7 (C-3', deoxyribose), 83.5 (C-4', deoxyribose), 69.9 (C-17, CH<sub>2</sub>), 69.7 (C-20, CH<sub>2</sub>), 27.1 (C-7' or C-8', isopropylidene CH<sub>3</sub>), 25.3 (C-7' or C-8', isopropylidene CH<sub>3</sub>), 19.1 (C-5', deoxyribose CH<sub>3</sub>); HRMS (ESI, m/z): calculated for C<sub>27</sub>H<sub>31</sub>N<sub>3</sub>O<sub>7</sub>F [M + H]<sup>+</sup> 528.2146; found 528.2145, calculated for C<sub>27</sub>H<sub>30</sub>N<sub>3</sub>O<sub>7</sub>FNa [M + Na]<sup>+</sup> 550.1965; found 550.1964.

*5'-deoxy-5-fluoro-N<sup>4</sup>-(3,4-diallyloxy)cinnamoyl*cytidine (**29**)

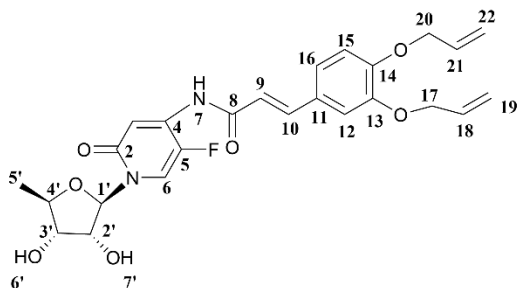

To 5'-deoxy-5-fluoro-2',3'-O-isopropylidencytidine (**27**) (0.48 g, 1.68 mmol) in methylene chloride (2 mL), 50% NaOH (0.27 g, 3.37 mM) was added. Then, after 1 min. stirring in ambient temperature, the solution of (3,4-diallyloxy)cinnamoyl chloride (**24**) (0.47 g, 1.69 mM) in methylene chloride (3 mL) was added dropwise. The reaction mixture was heated with stirring for 1 h at 50°C. After cooling, 5 M HCl aq. (2.5 mL) and methanol (2 mL) were added to reaction mixture and stirred 20 min. in ambient temperature. Due to the lack of progress, methylene chloride was distilled off and another portion of methanol (10 mL) and conc. HCl aq. (1.5 mL) were added to reaction mixture. After additional 1 h stirring, it was diluted with an aqueous saturated sodium bicarbonate solution, then extracted with methylene chloride. The organic layer was dried over anhydrous MgSO<sub>4</sub>, and the solvent was distilled off under reduced pressure. The crude product **29** was purified by flash column chromatography on a silica gel with methylene chloride: methanol 50:1 to 25:1. Yield 0.19 g (23%); m.p. 59°C (dec.); <sup>1</sup>H NMR (500 MHz, CDCl<sub>3</sub>) δ 7.75 (d, 1H,  $J = 15.6$  Hz, H-10, double bond), 7.16 (d, 1H,  $J = 8.2$  Hz, H-16, aromatic CA), 7.13 (d, 1H,  $J = 1.5$  Hz, H-12, aromatic CA), 6.84 (d, 1H,  $J = 8.4$  Hz, H-15, aromatic CA), 6.11-6.01 (m, 2H, H-18, H-21, allyl CH), 5.72 (d, 1H,  $J = 3.7$  Hz, H-1', CHN deoxyribose), 5.47-4.38 (m, 2H, H-19, H-22, allyl CH<sub>2</sub>), 5.32-5.27 (m, 2H, H-19, H-22, allyl CH<sub>2</sub>), 4.63 (m, 2H, H-17, CH<sub>2</sub>), 4.61 (m, 2H, H-20, CH<sub>2</sub>), 4.30 (bs, 1H, H-4', deoxyribose), 4.27 (m, 1H, H-2', deoxyribose), 3.86 (bs, 1H, H-3', deoxyribose), 3.56 (bs, 1H, deoxyribose OH), 1.38 (d, 3H,  $J = 6,5$  Hz, H-5', CH<sub>3</sub> deoxyribose), <sup>13</sup>C NMR (125 MHz, CDCl<sub>3</sub>) δ 151.1 (C-14, aromatic CA), 148.4 (C-13, aromatic CA), 146.6 (C-10, double bond), 133.0 (C-18, allyl CH), 132.8 (C-21, allyl CH), 127.5 (C-11, aromatic CA), 123.2 (C-16, aromatic CA), 118.0 (C-19, C-22, allyl CH<sub>2</sub>), 113.7 (C-12, aromatic CA), 113.3 (C-15, aromatic CA), 92.9 (C-1', deoxyribose), 81.9 (C-4', deoxyribose), 76.2 (C-2', deoxyribose), 75.3 (C-3', deoxyribose), 70.0 (C-17, CH<sub>2</sub>), 69.6 (C-20, CH<sub>2</sub>), 18.8 (C-5', deoxyribose CH<sub>3</sub>); HRMS (ESI, m/z): calculated for C<sub>24</sub>H<sub>27</sub>N<sub>3</sub>O<sub>7</sub>F [M + H]<sup>+</sup> 488.1833; found 488.1830.

[1] N. Bukowski, J. Pandey, L. Doyle, T. Richard, C. Anderson and Y. Zhu, *Bioconjug Chem.* 2014, **25**(12), 2189.

[2] H. Tozuka, M. Ota, H. Kofujita and K. Takahashi, *J. Wood Sci.* 2005, **51**, 48.

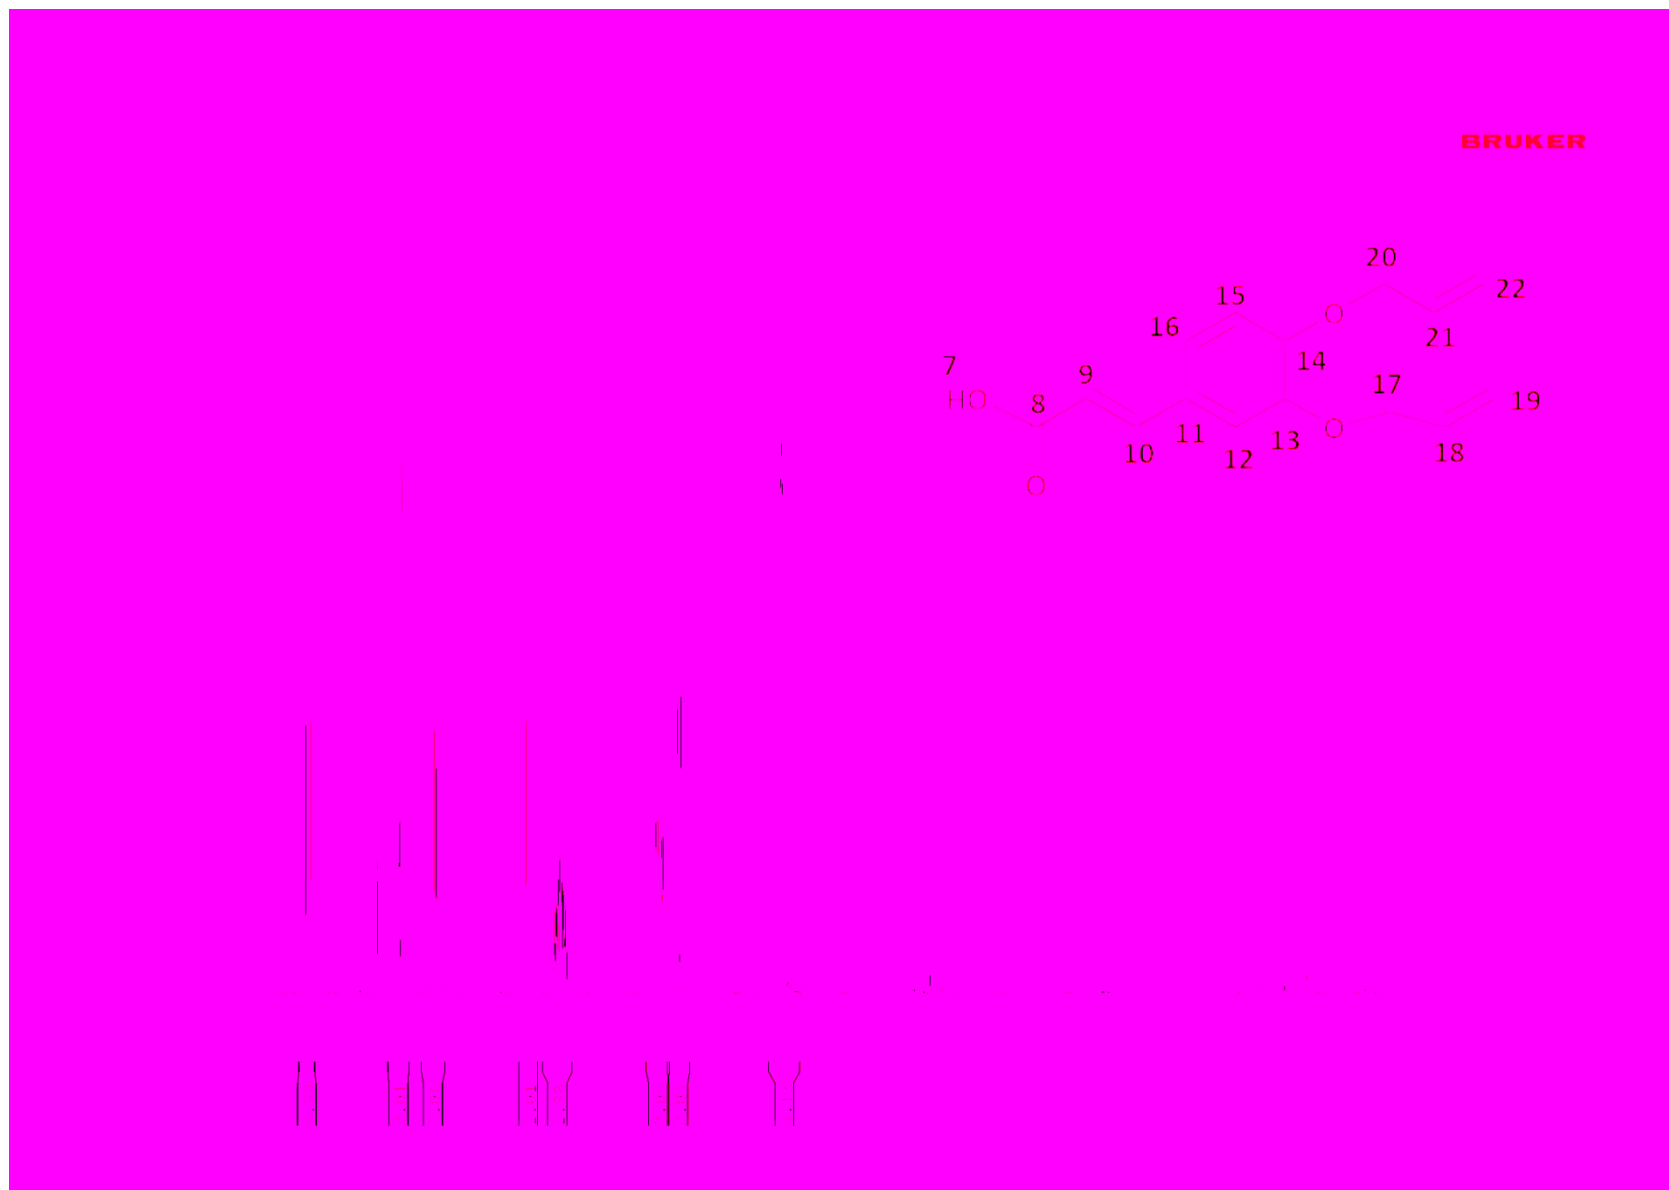

BRUKER

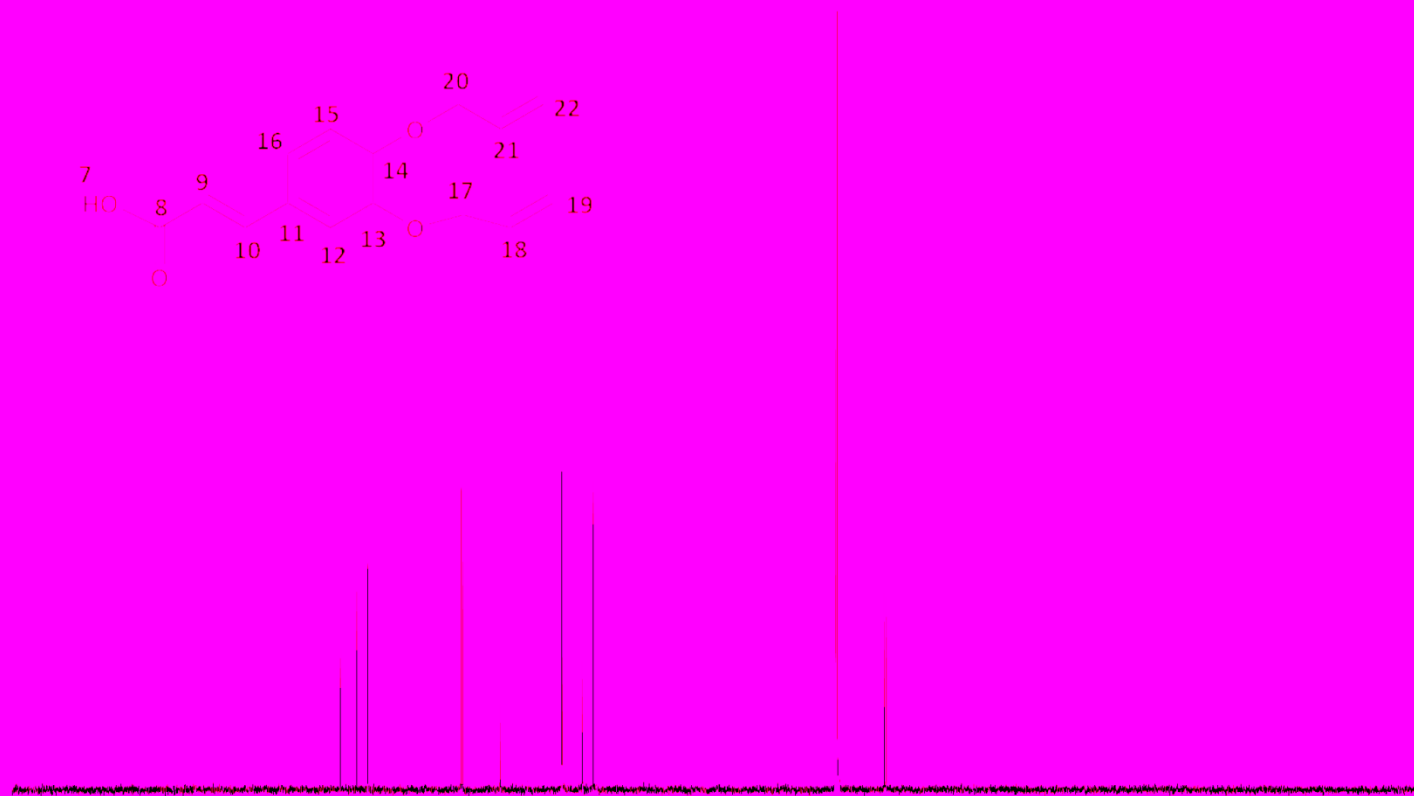

Figure S2. <sup>13</sup>C NMR spectrum of compound **18** (CDCl<sub>3</sub>)

BRUKER

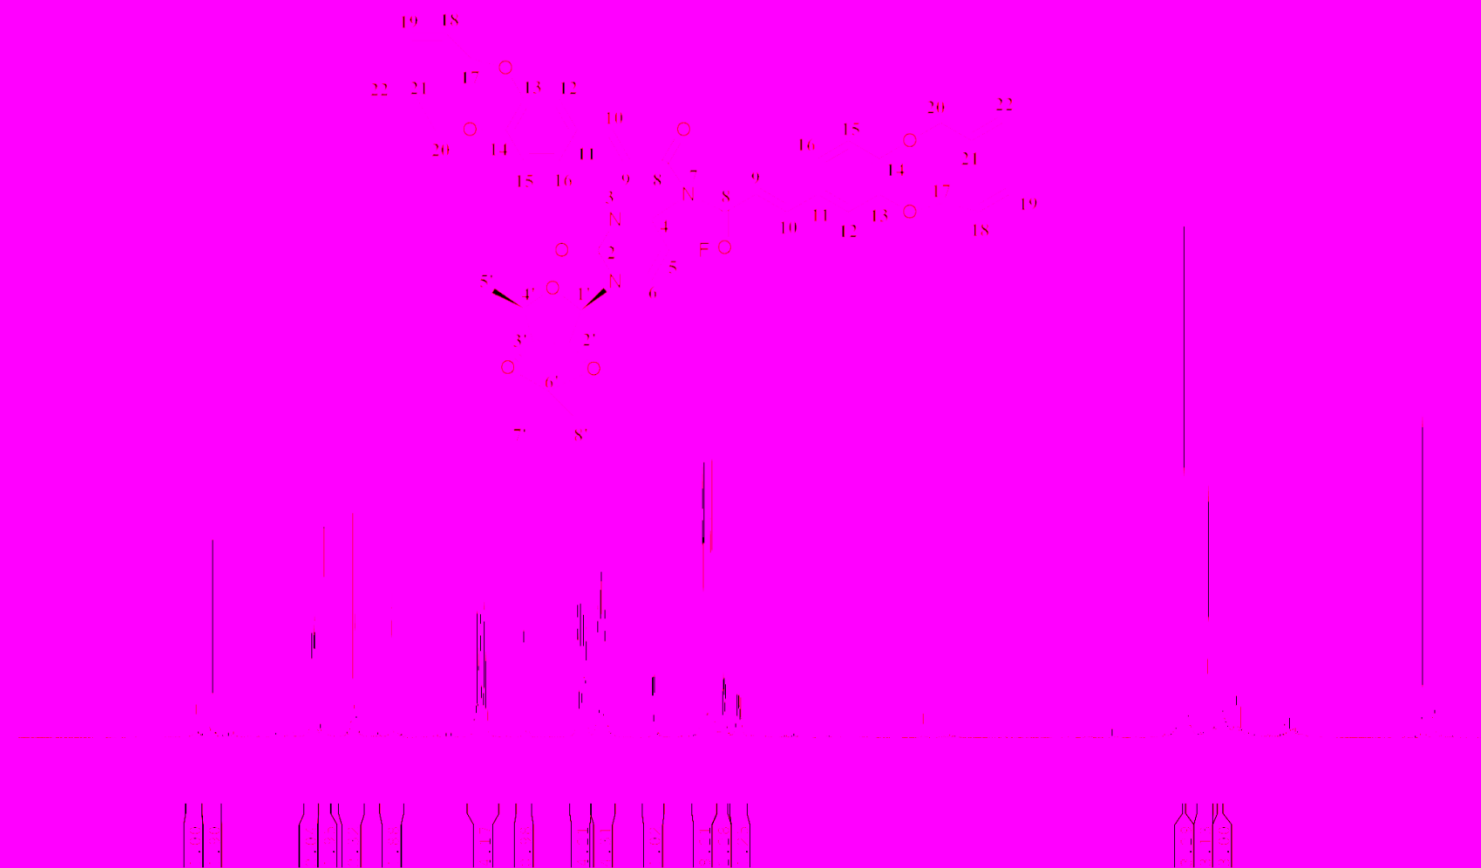

Figure S3.  $^1\text{H}$  NMR spectrum of compound **26** ( $\text{CDCl}_3$ )

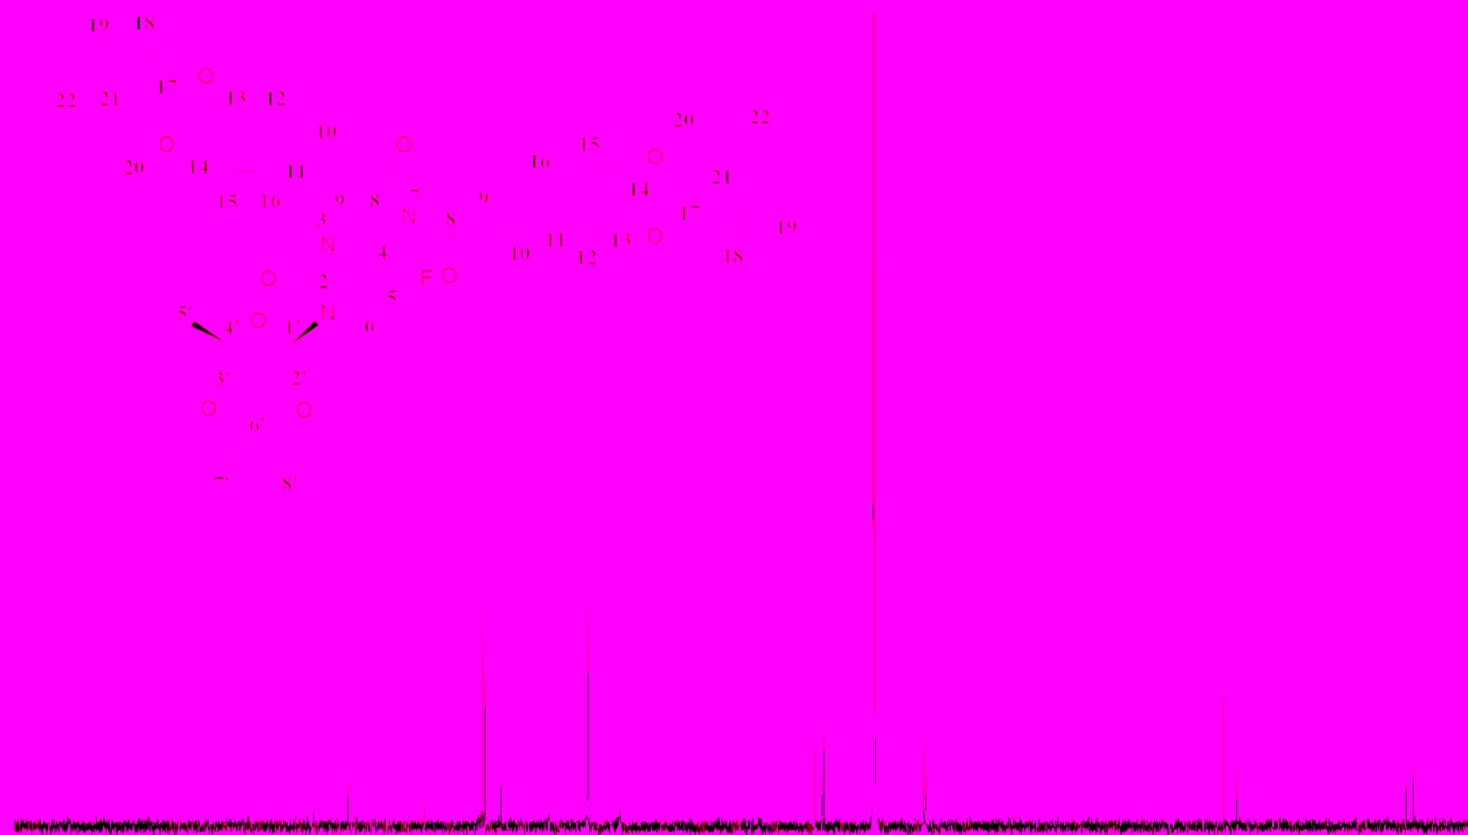

Figure S4.  $^{13}\text{C}$  NMR spectrum of compound **26** ( $\text{CDCl}_3$ )



BRUKER

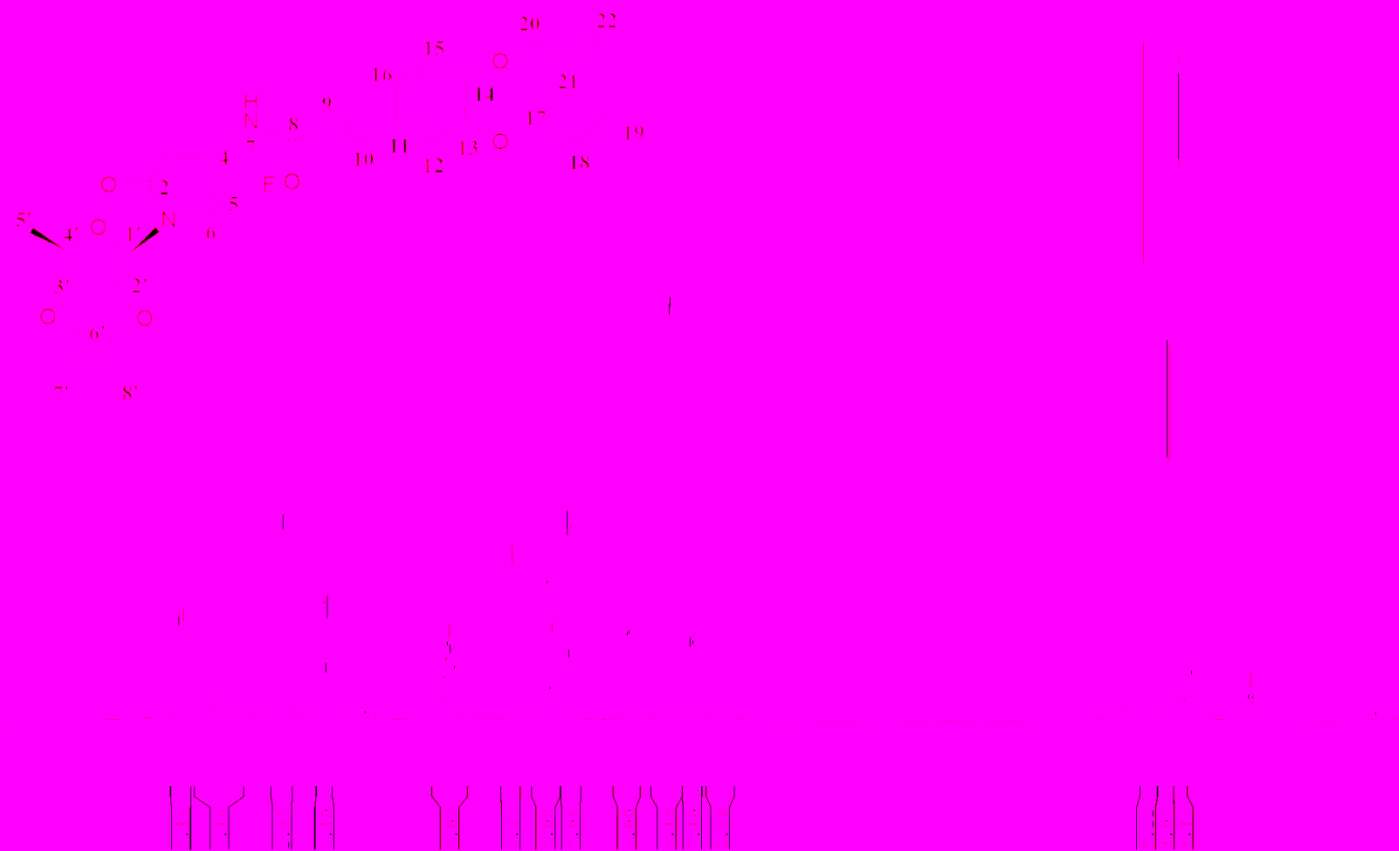

Figure S5.  $^1\text{H}$  NMR spectrum of compound **28** ( $\text{CDCl}_3$ )

BRUKER

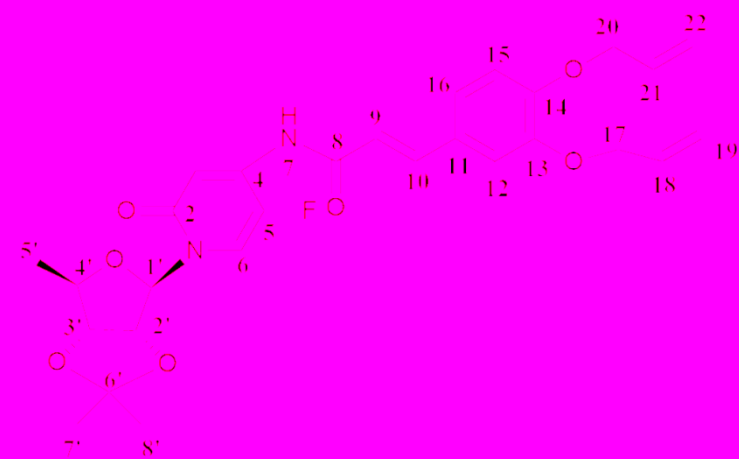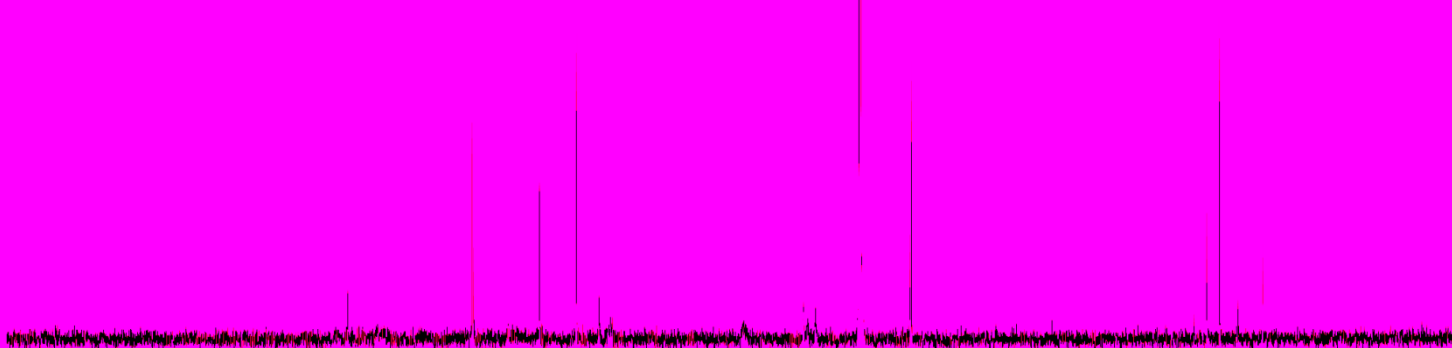

Figure S6.  $^{13}\text{C}$  NMR spectrum of compound **28** ( $\text{CDCl}_3$ )

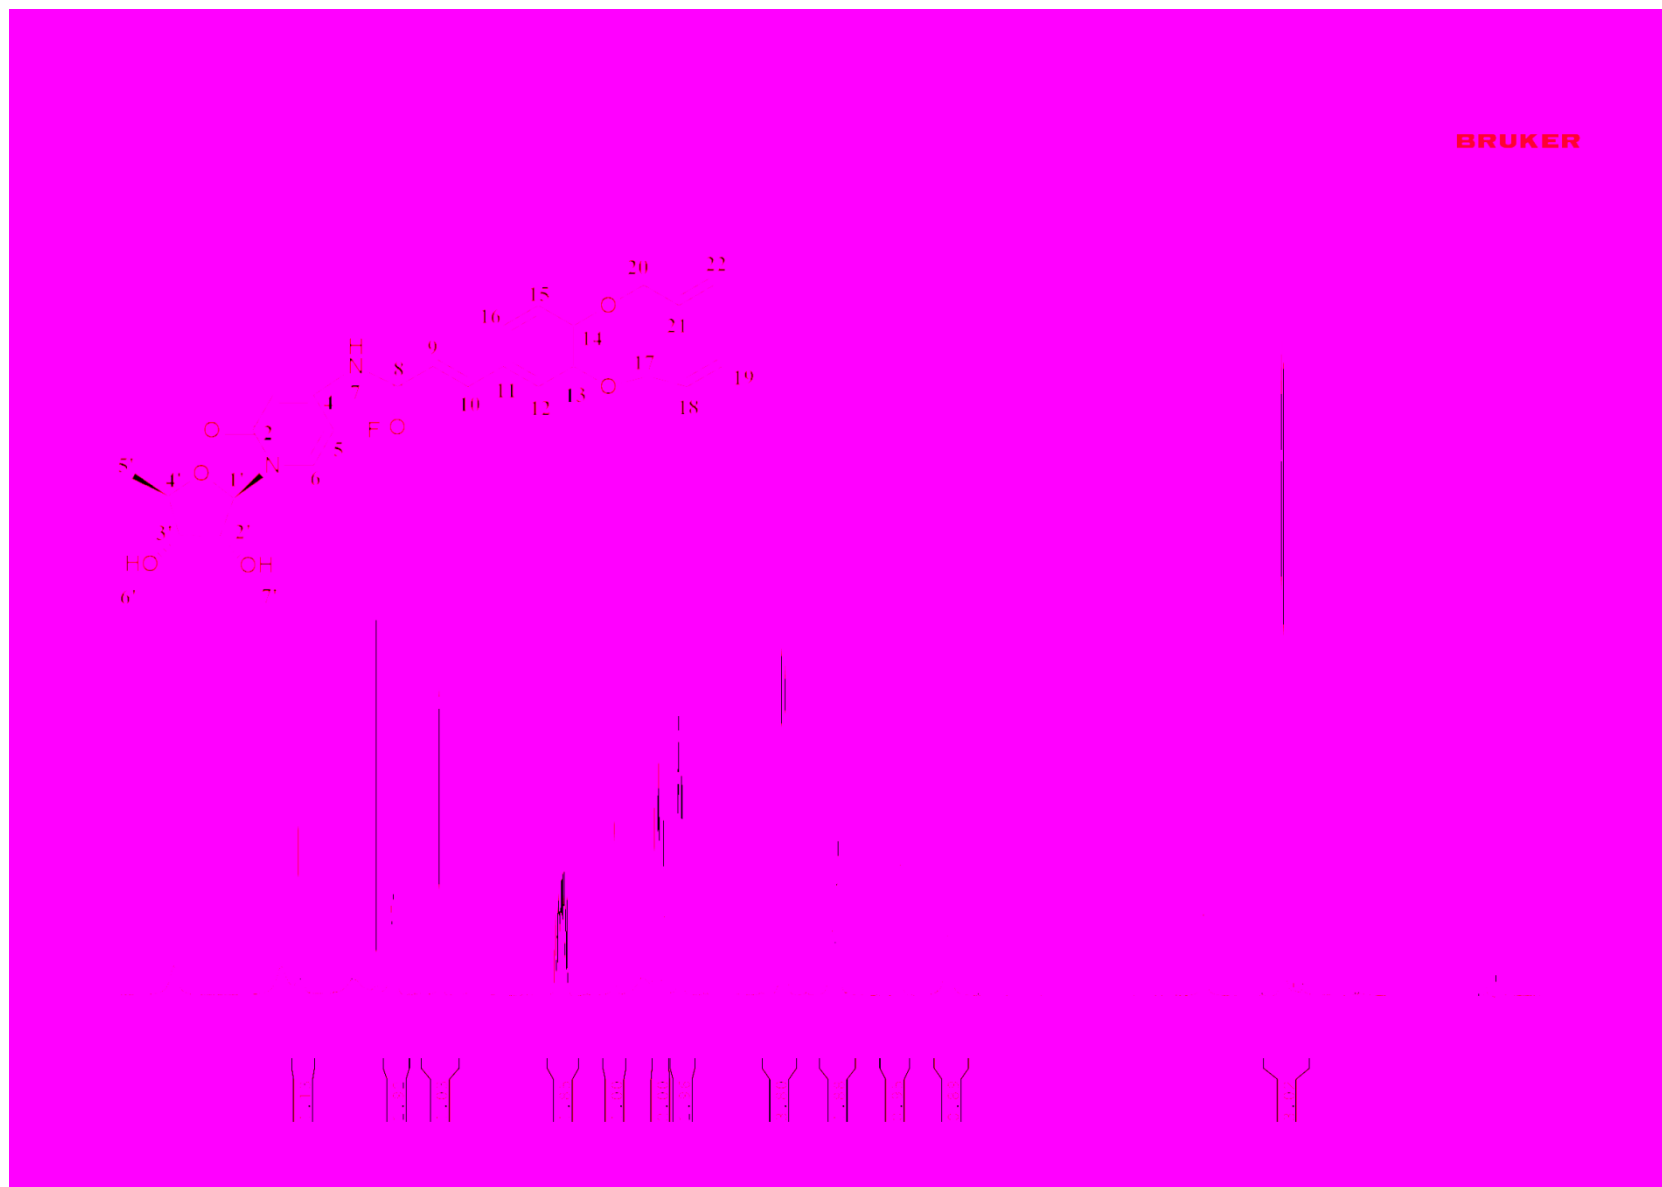

Figure S7.  $^1\text{H}$  NMR spectrum of compound **29** ( $\text{CDCl}_3$ )

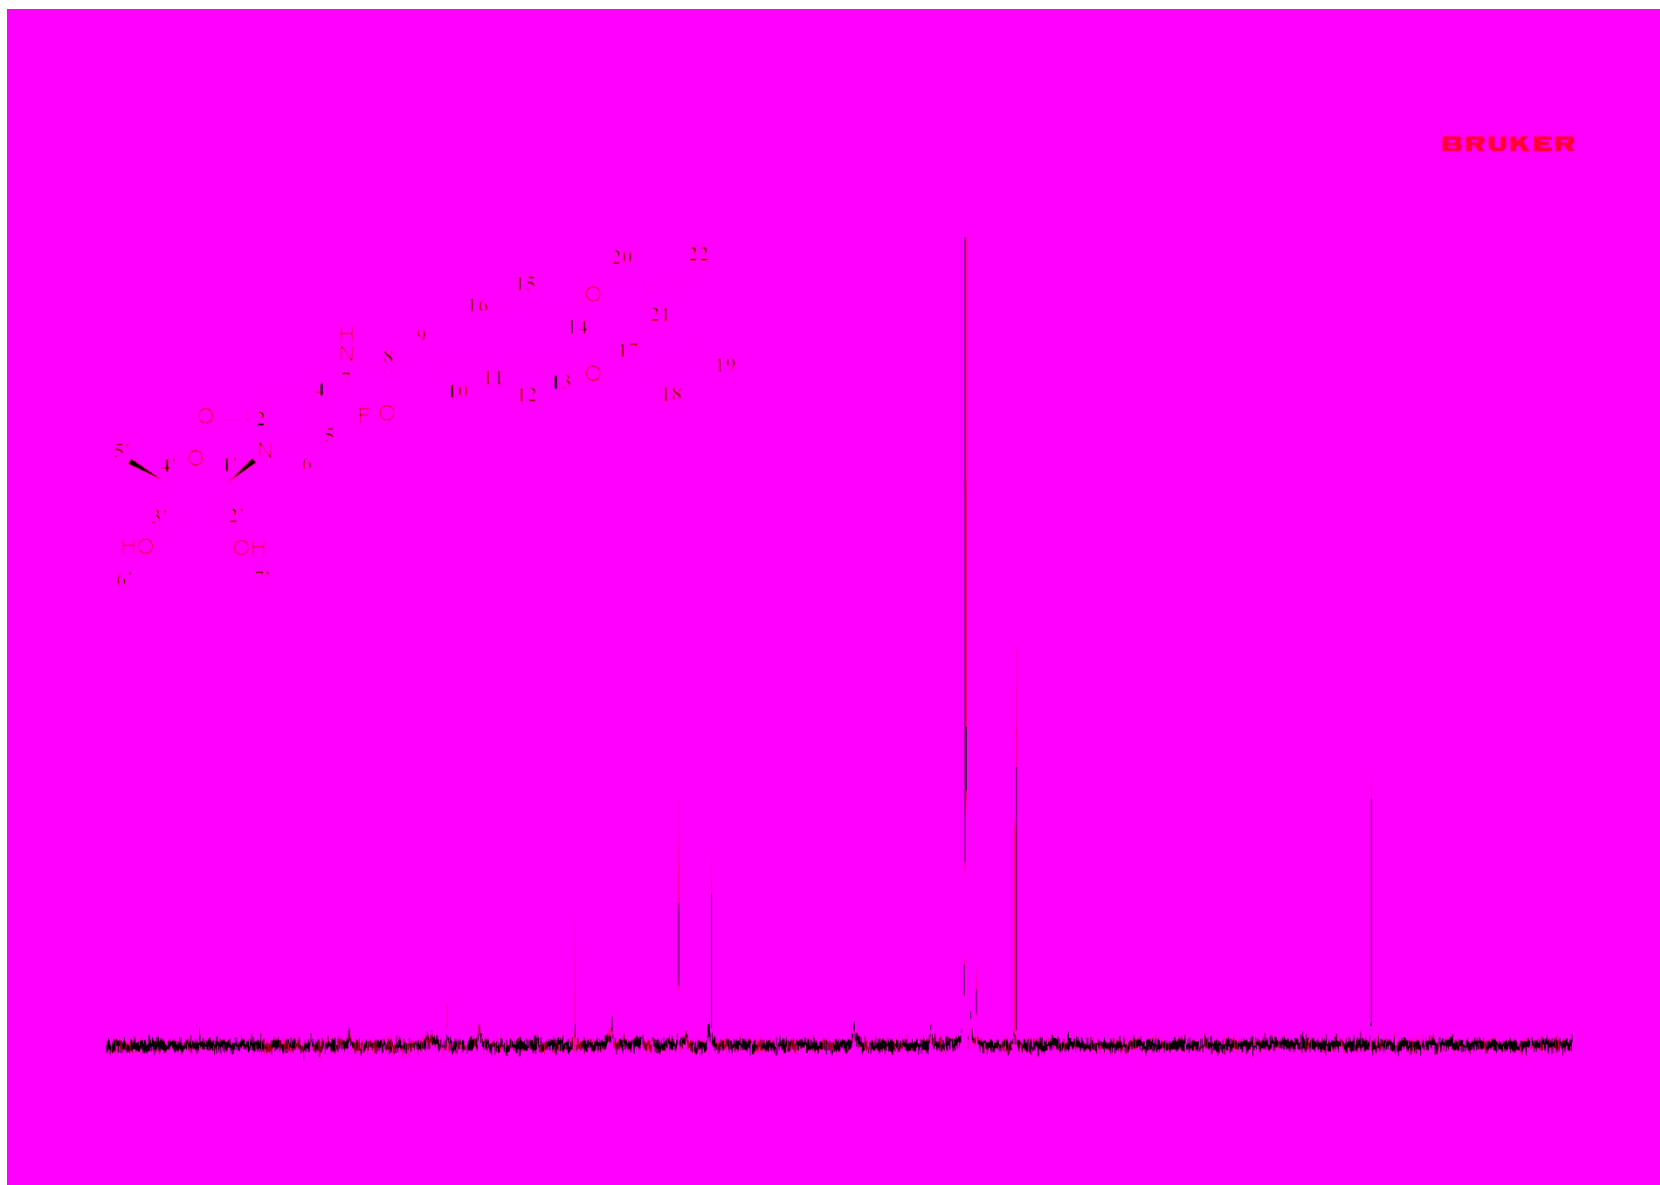

Figure S8.  $^{13}\text{C}$  NMR spectrum of compound **29** ( $\text{CDCl}_3$ )

BRUKER

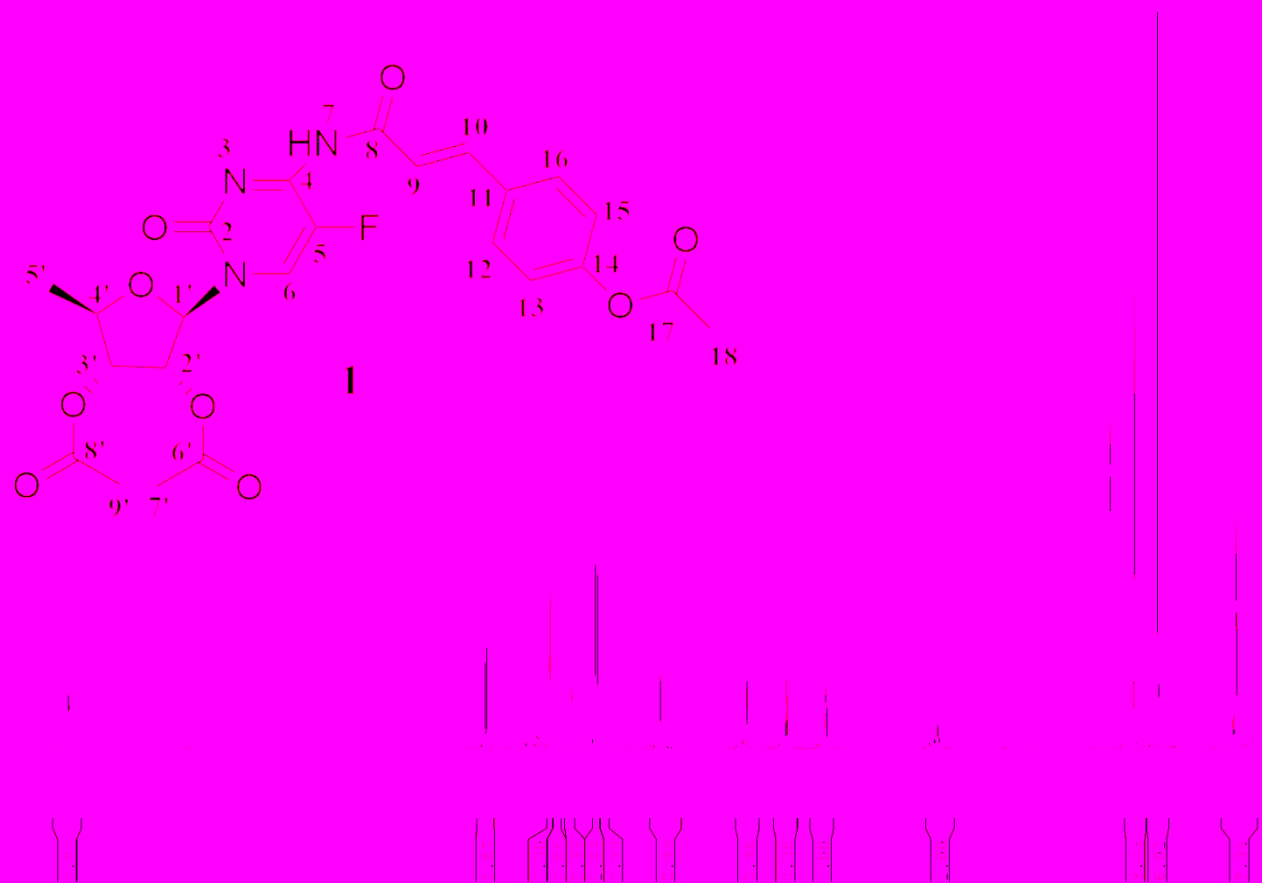

Figure S9.  $^1\text{H}$  NMR spectrum of compound 1 ( $\text{DMSO-}d_6$ )

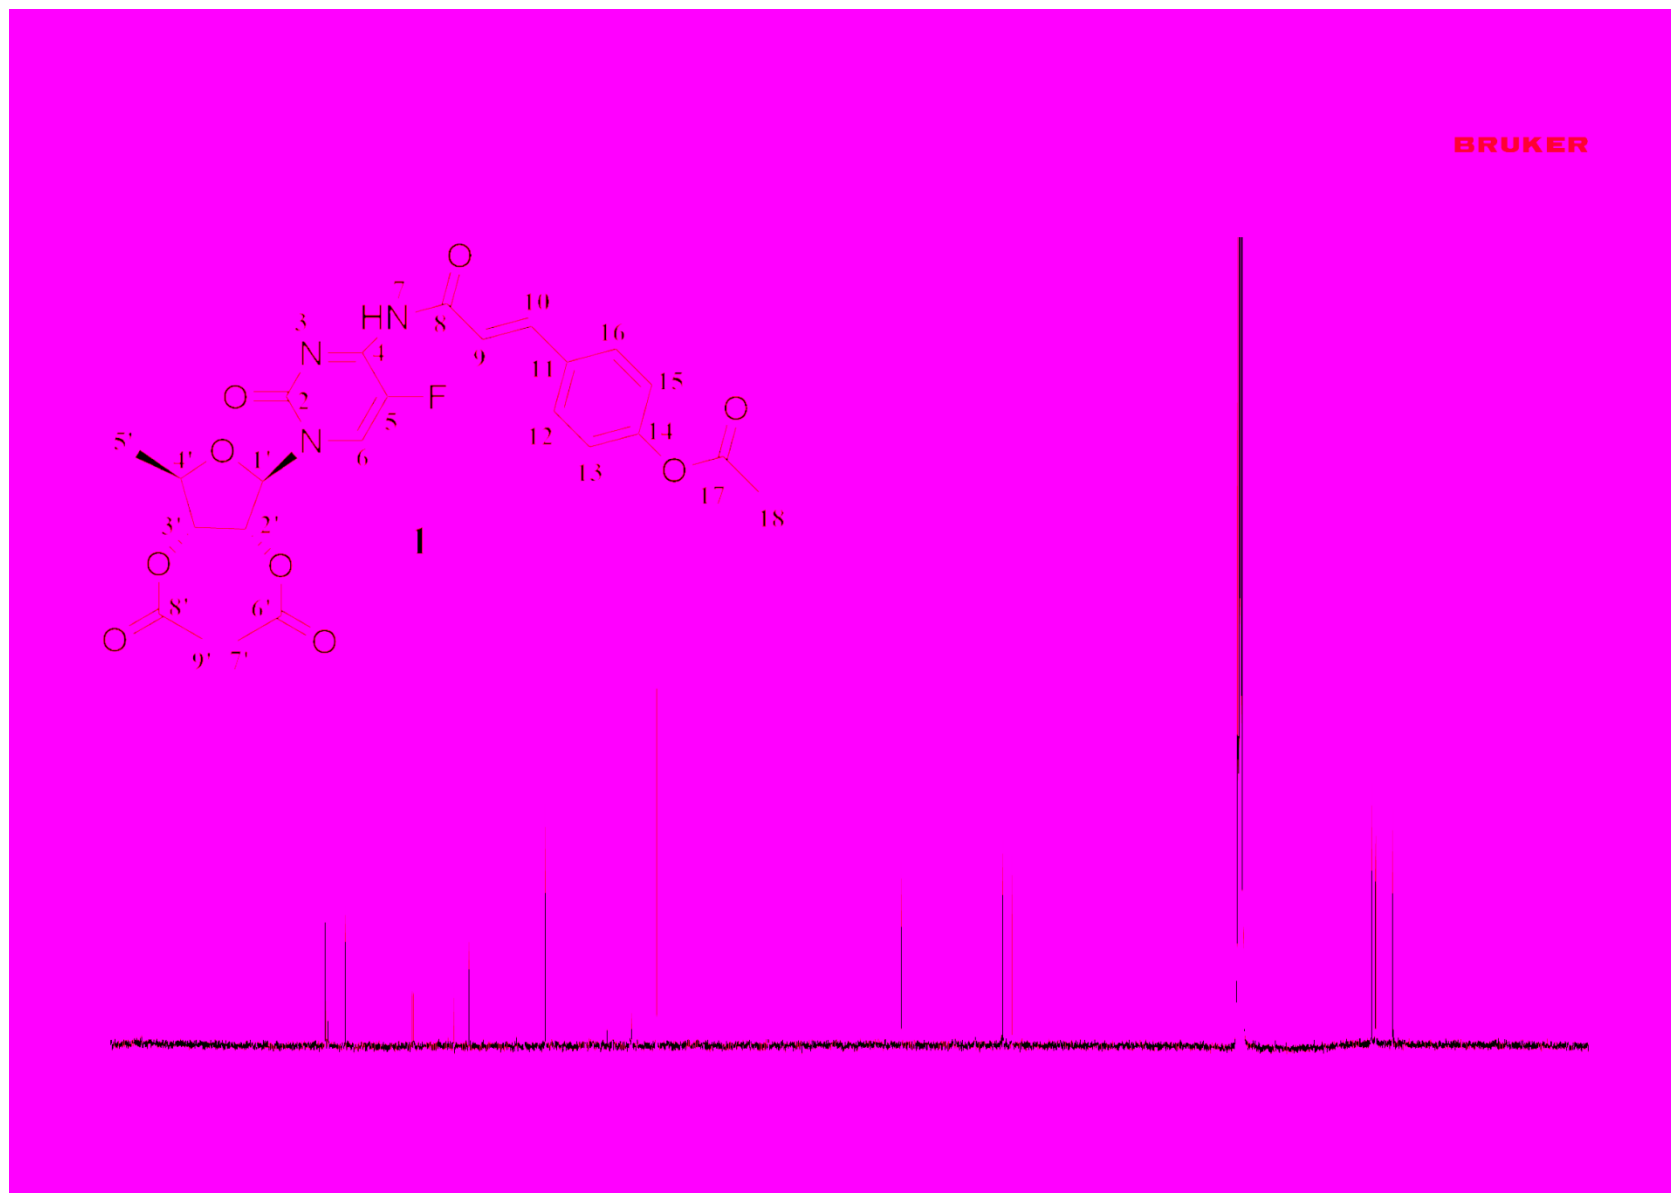

BRUKER

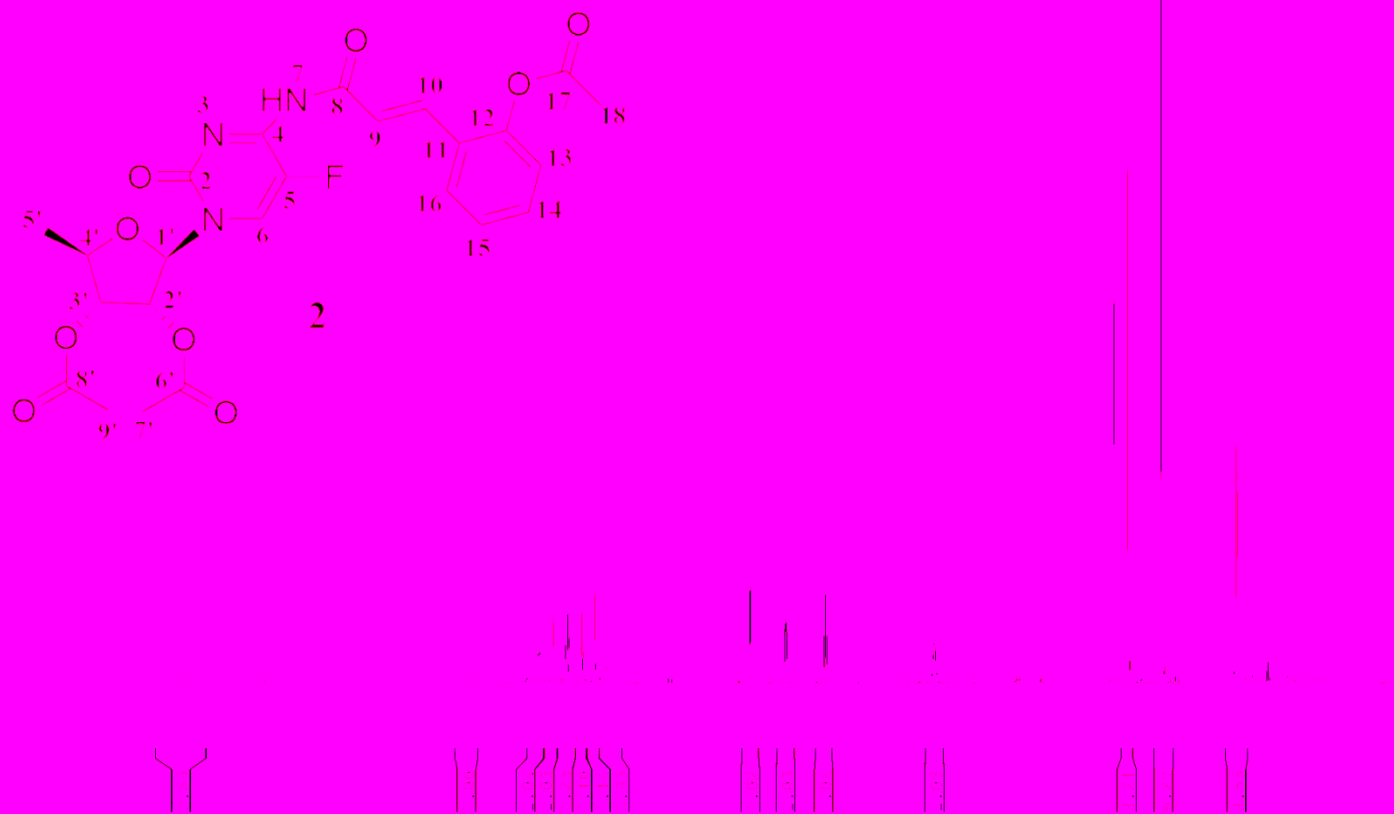

Figure S11. <sup>1</sup>H NMR spectrum of compound 2 (DMSO-d<sub>6</sub>)

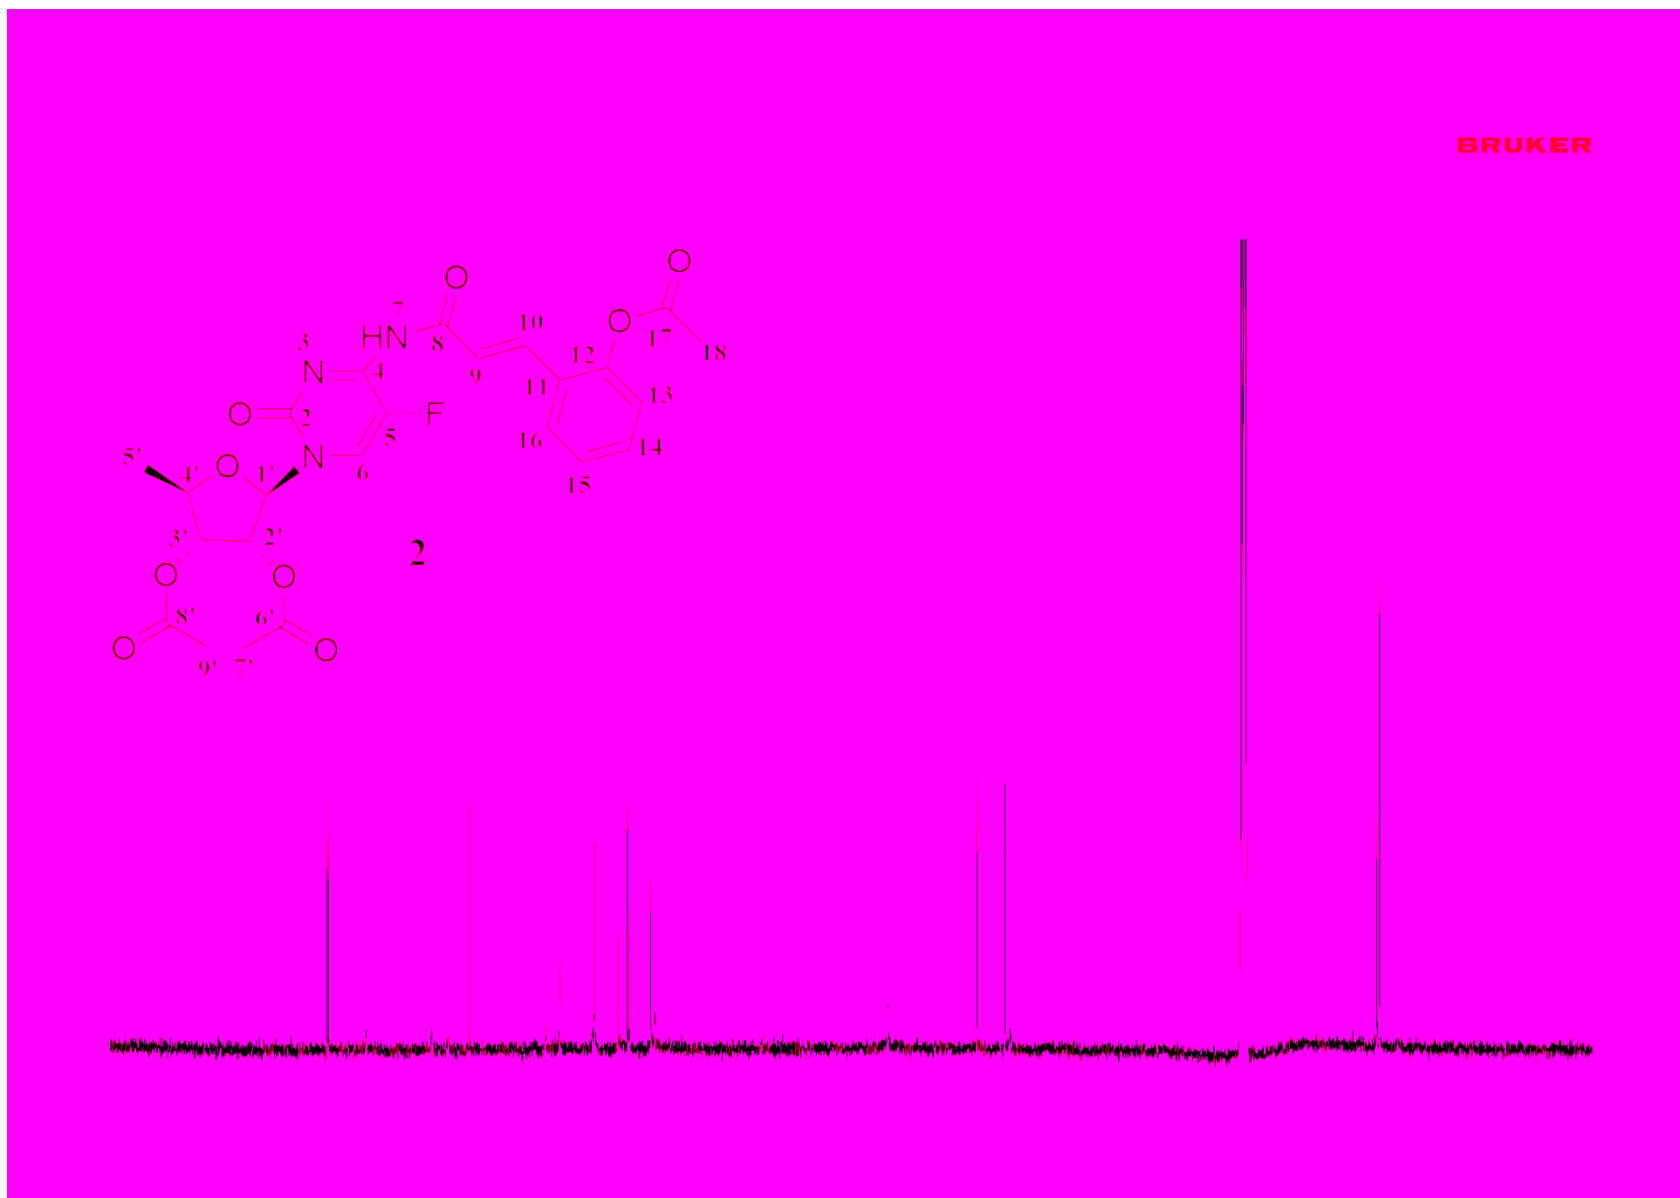

Figure S12. <sup>13</sup>C NMR spectrum of compound 2 (DMSO-*d*<sub>6</sub>)



BRUKER

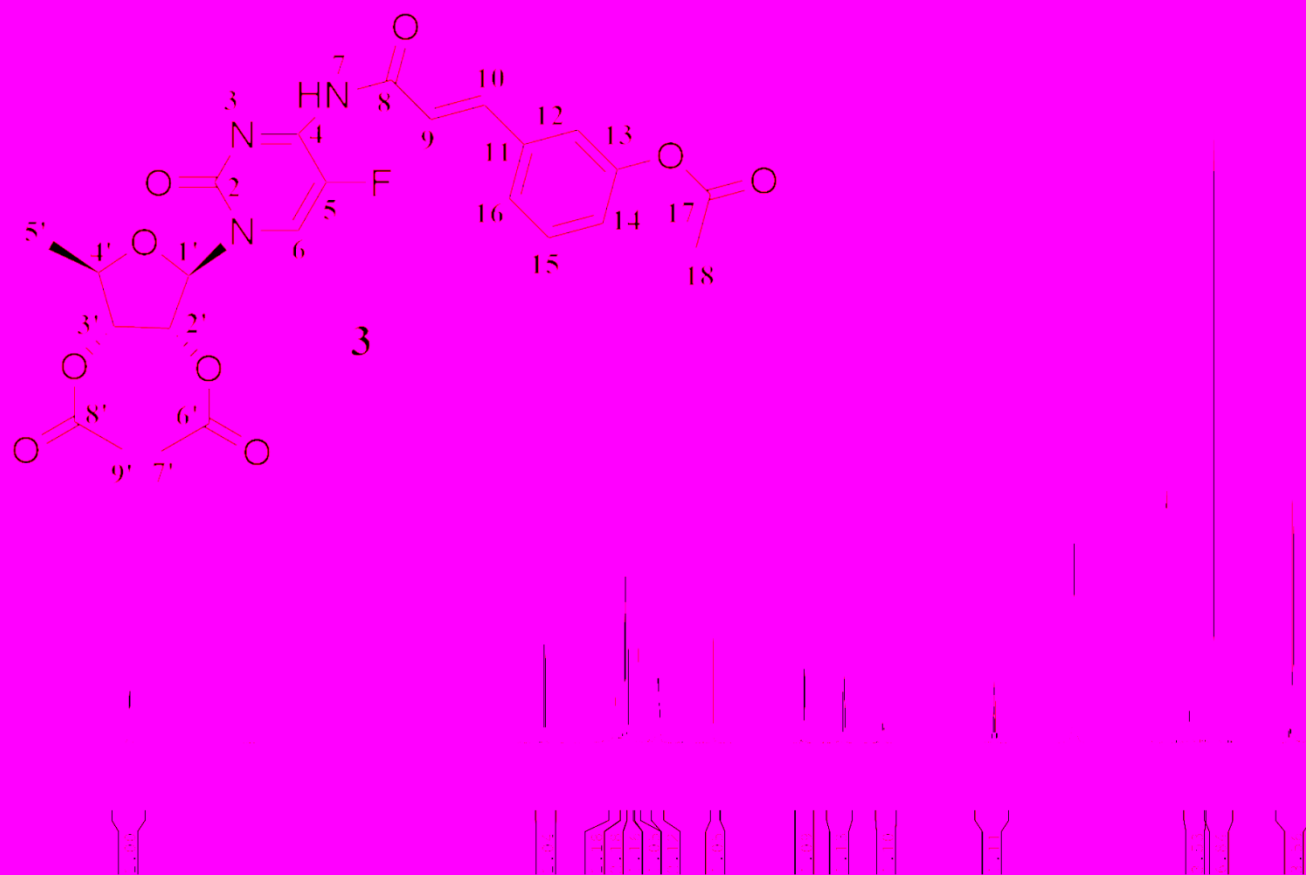

Figure S13. <sup>1</sup>H NMR spectrum of compound **3** (DMSO-d<sub>6</sub>)

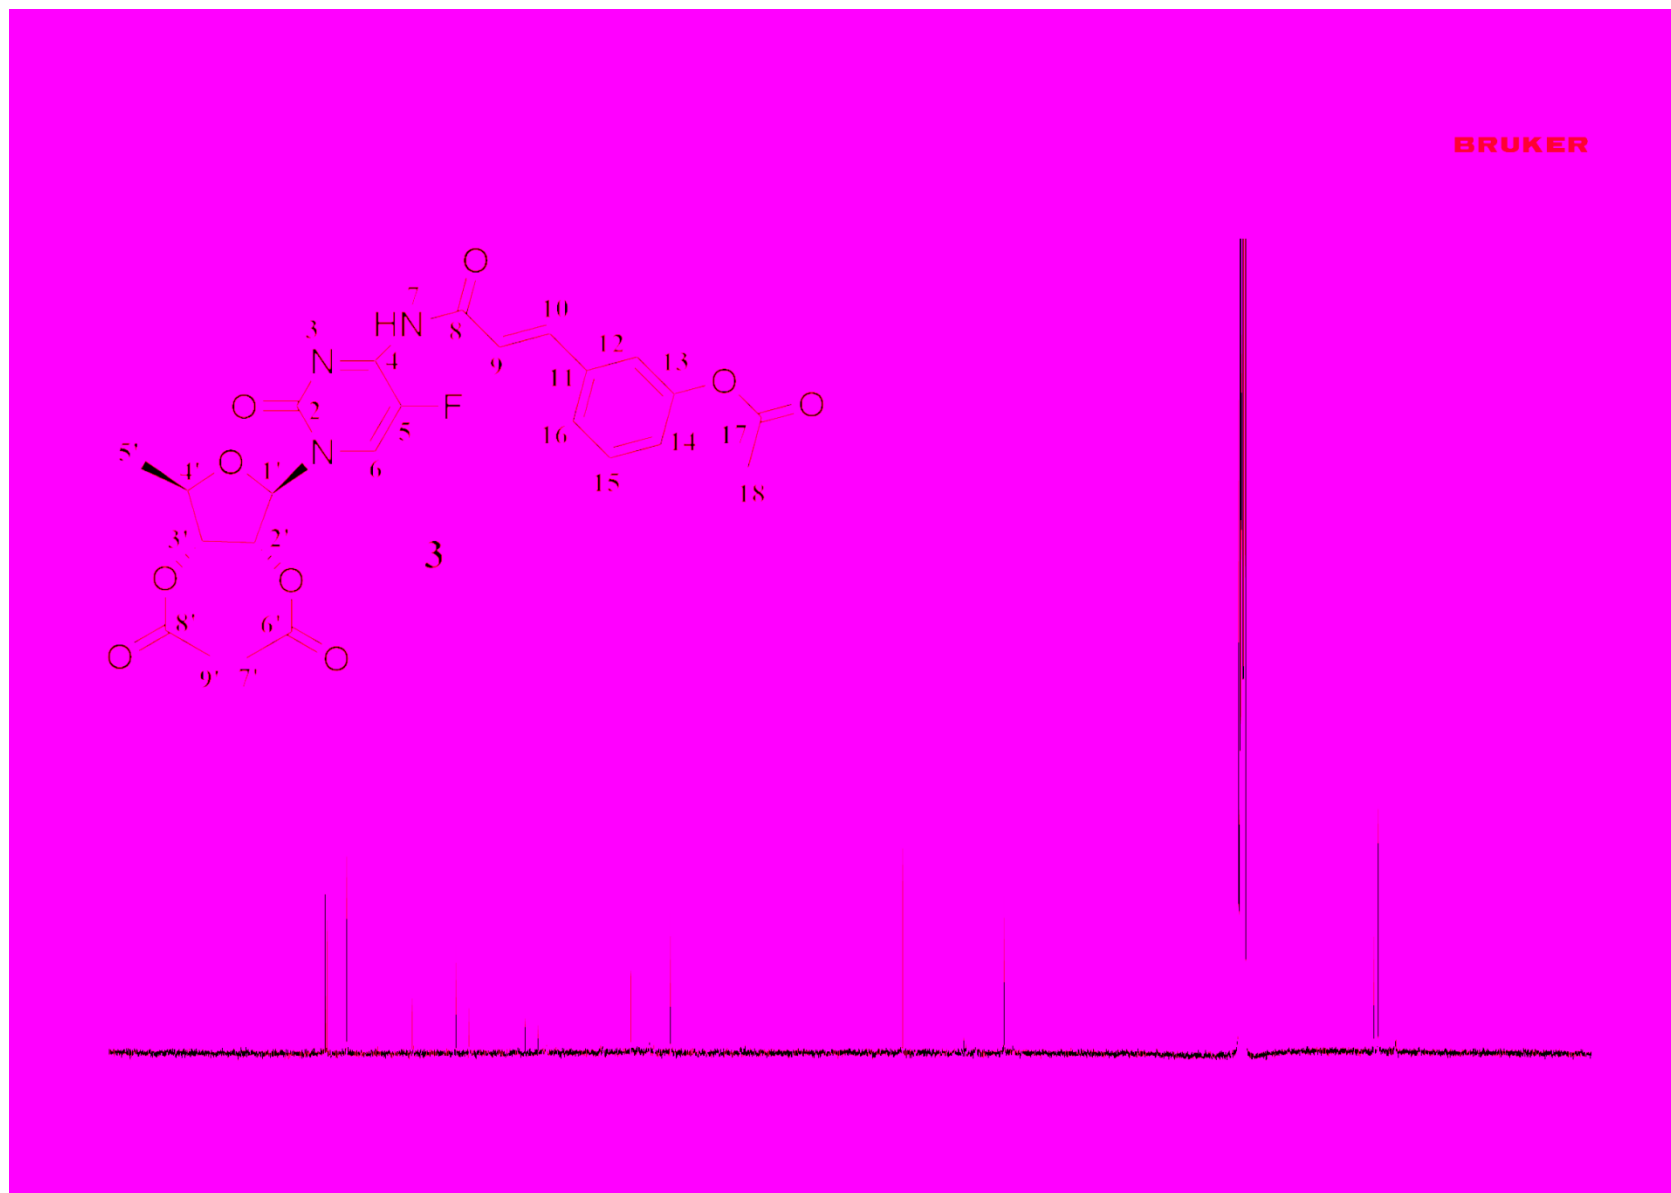

Figure S14.  $^{13}\text{C}$  NMR spectrum of compound **3** (DMSO- $d_6$ )

BRUKER

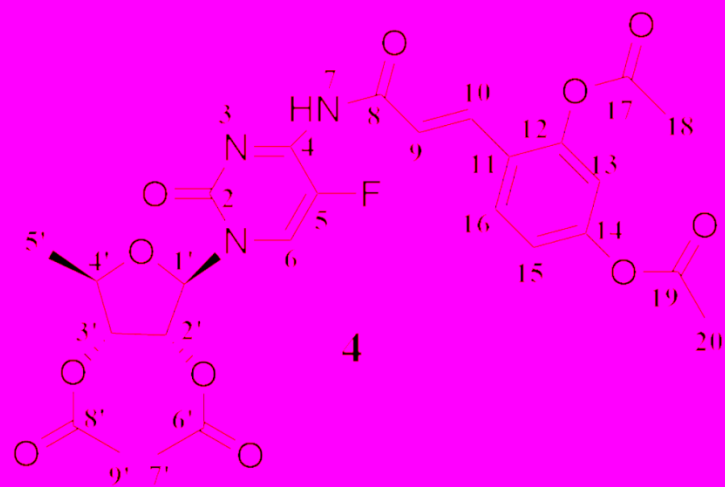

4

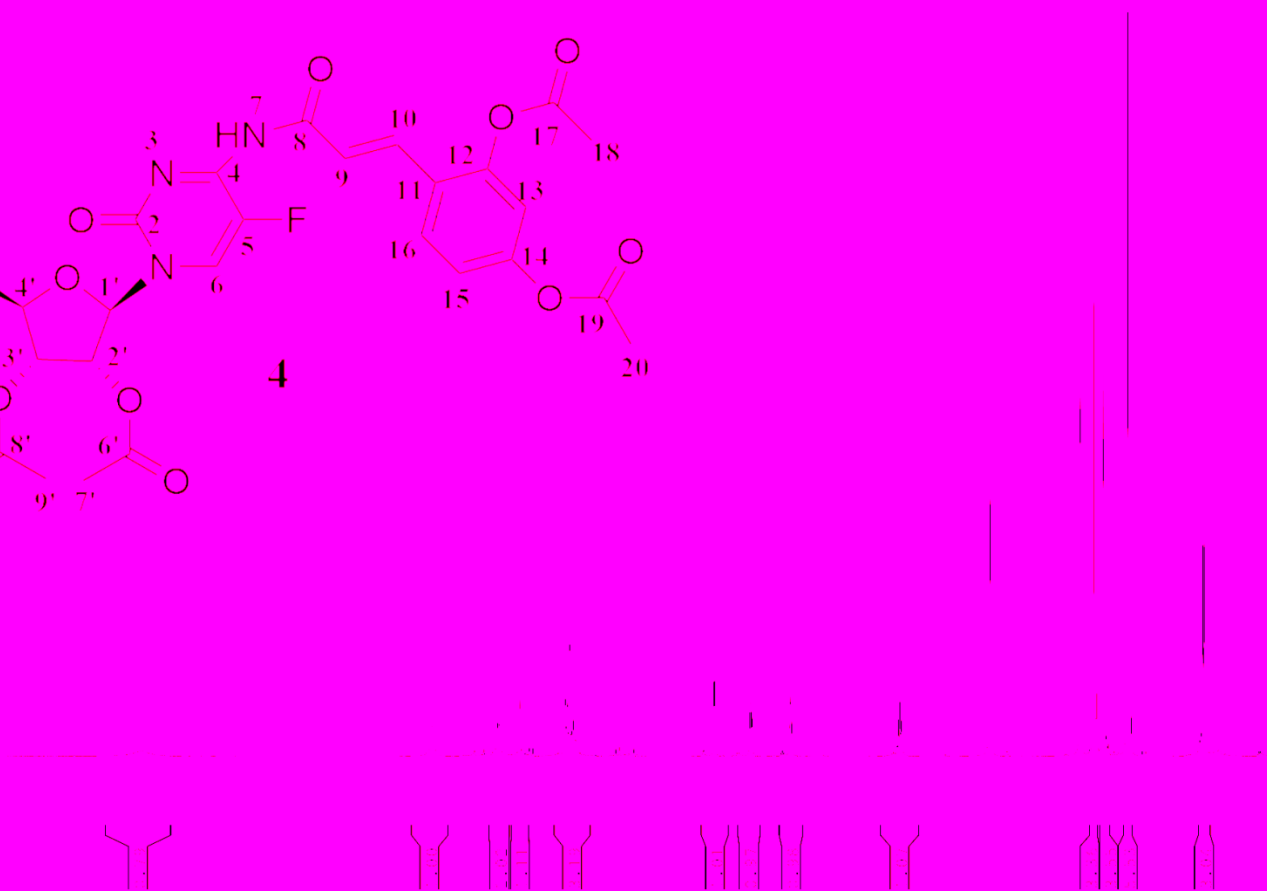

Figure S15. <sup>1</sup>H NMR spectrum of compound 4 (DMSO-*d*<sub>6</sub>)

BRUKER

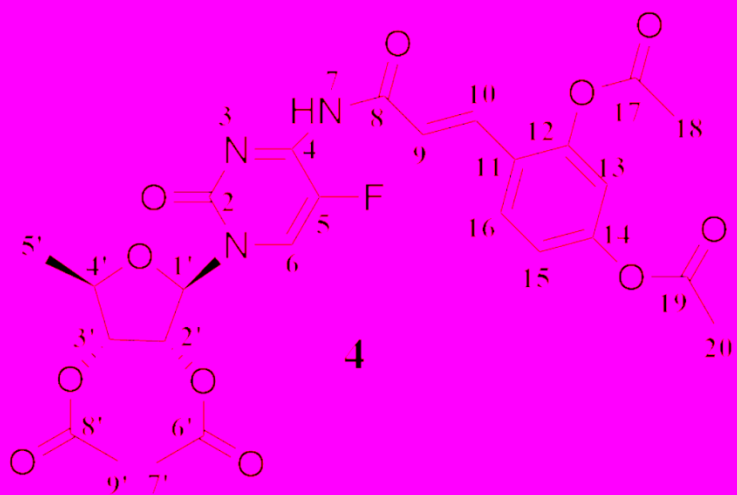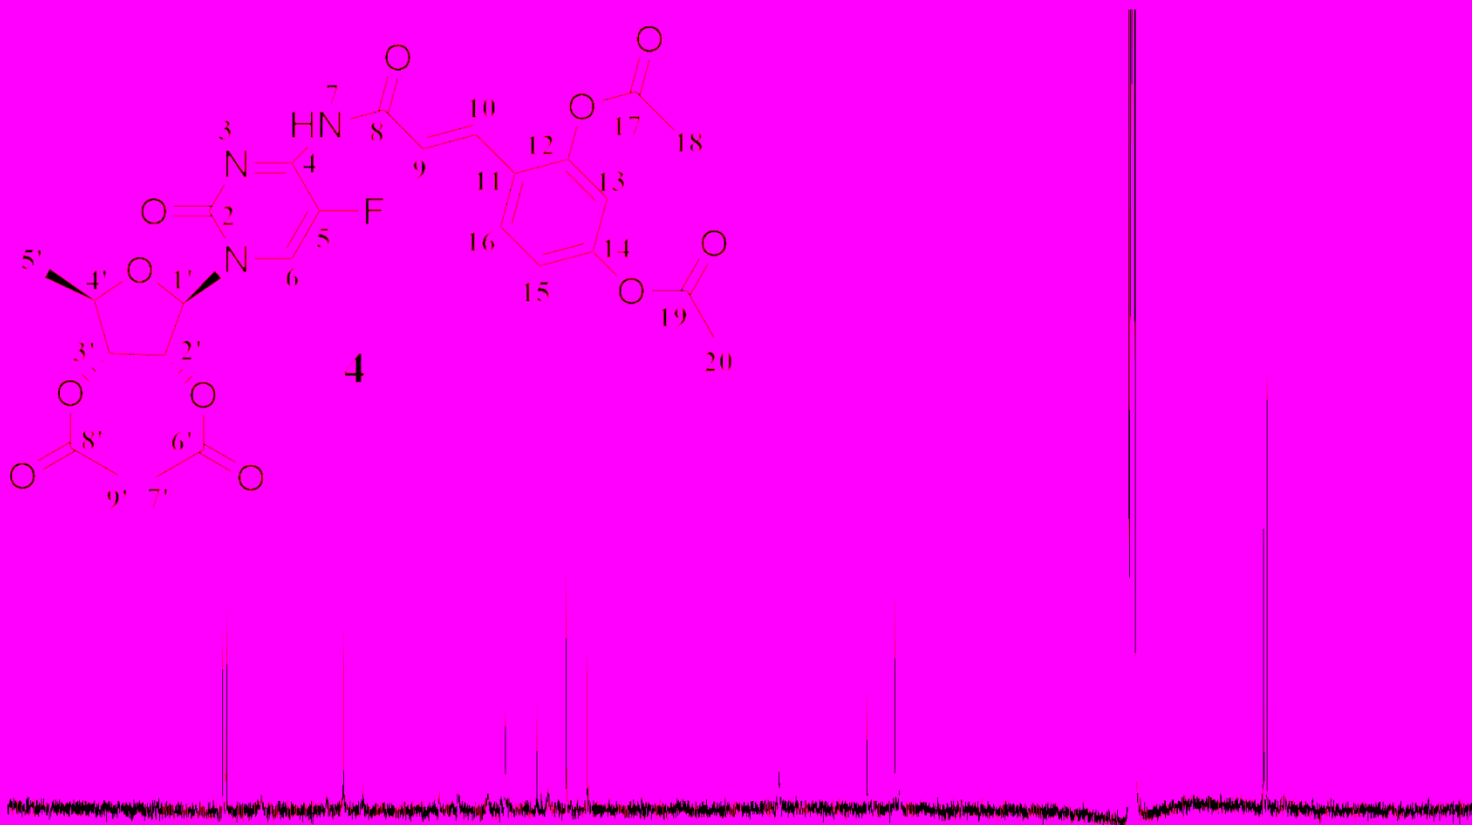

Figure S16. <sup>13</sup>C NMR spectrum of compound 4 (DMSO-*d*<sub>6</sub>)

BRUKER

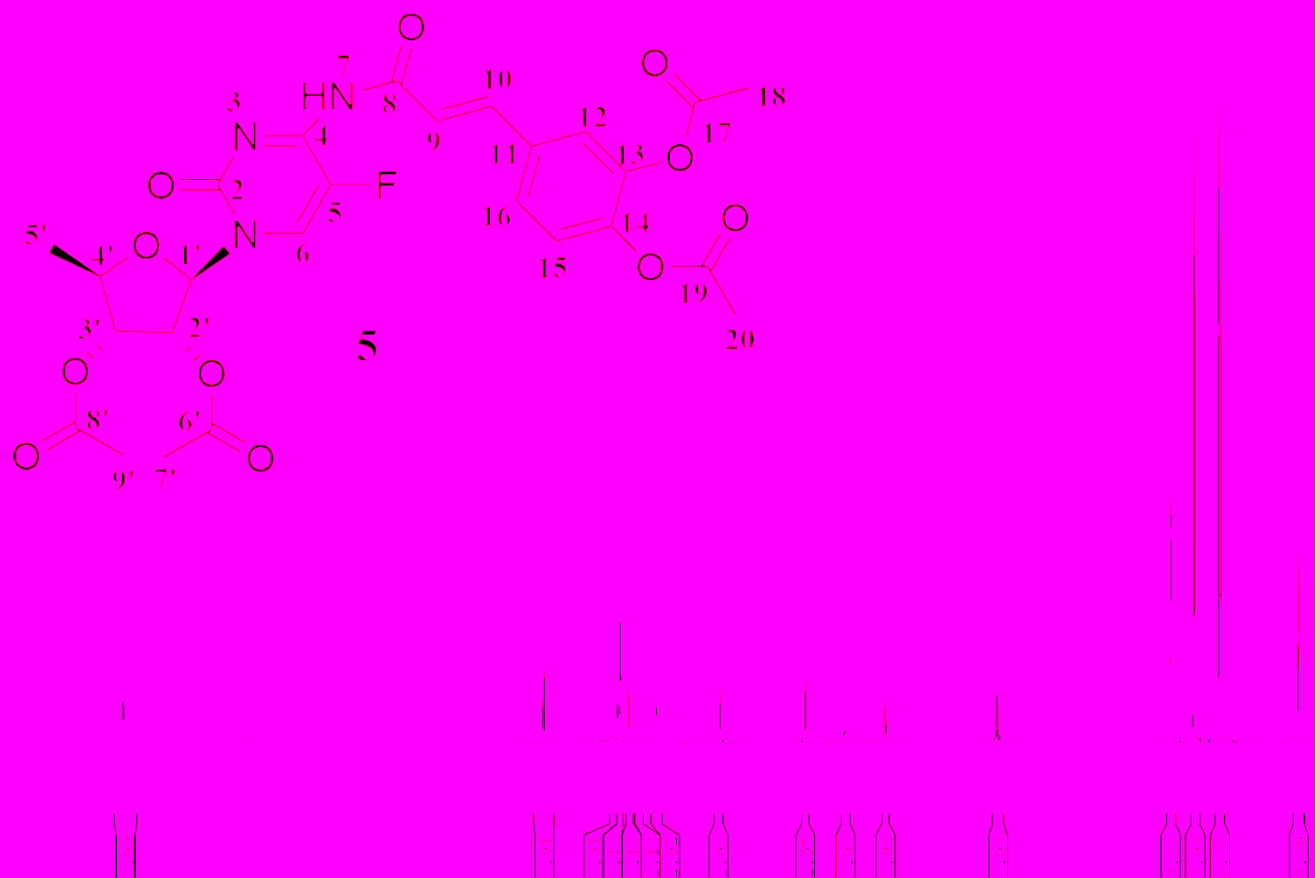

Figure S17.  $^1\text{H}$  NMR spectrum of compound 5 ( $\text{DMSO-}d_6$ )

BRUKER

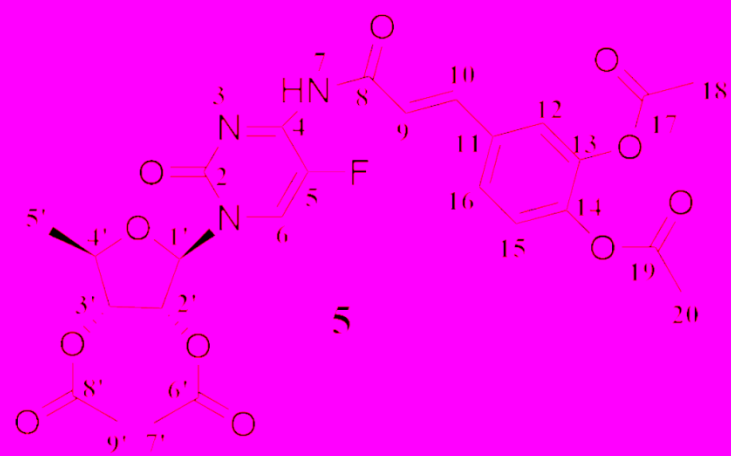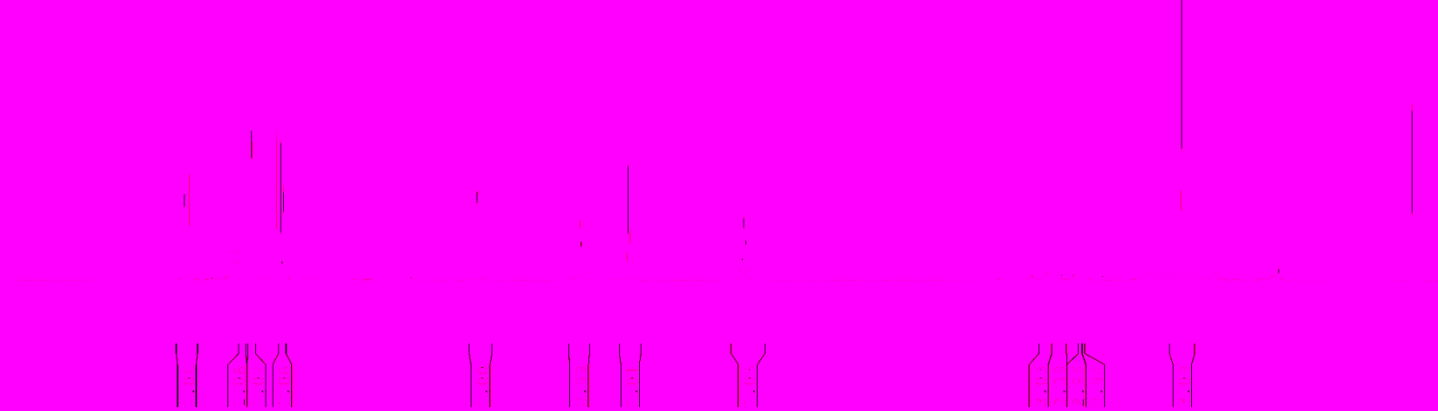

Figure S18. <sup>1</sup>H NMR spectrum of compound 5 (CDCl<sub>3</sub>)

BRUKER

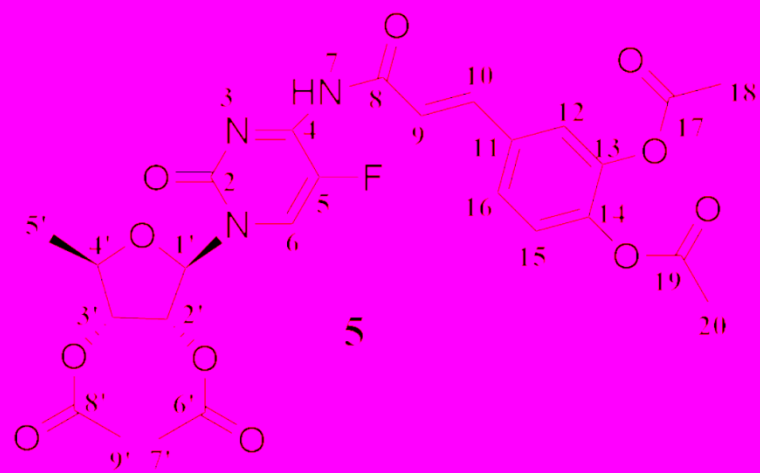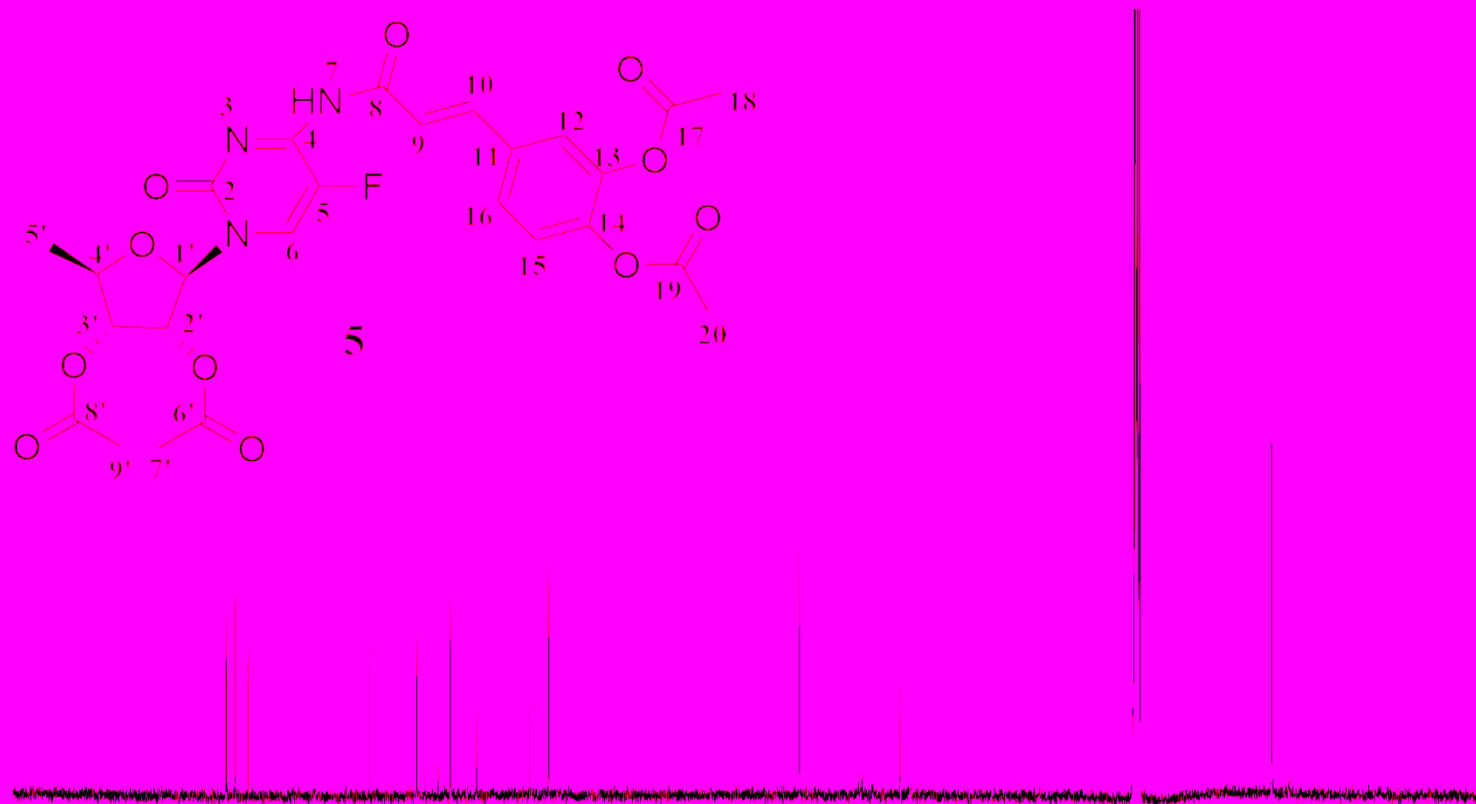

Figure S19.  $^{13}\text{C}$  NMR spectrum of compound (DMSO- $d_6$ )

BRUKER

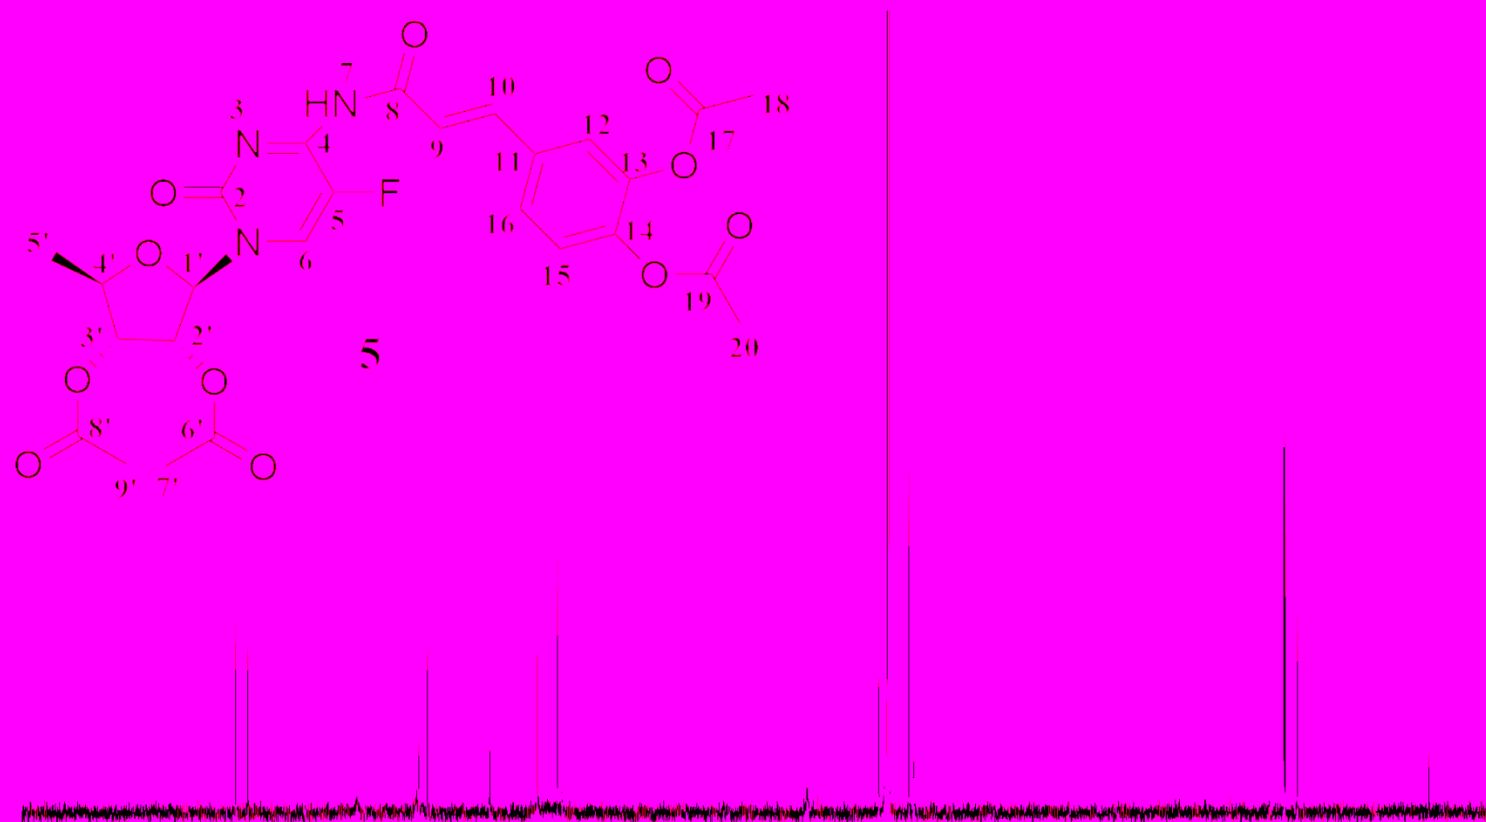

Figure S20. <sup>13</sup>C NMR spectrum of compound 5 (CDCl<sub>3</sub>)



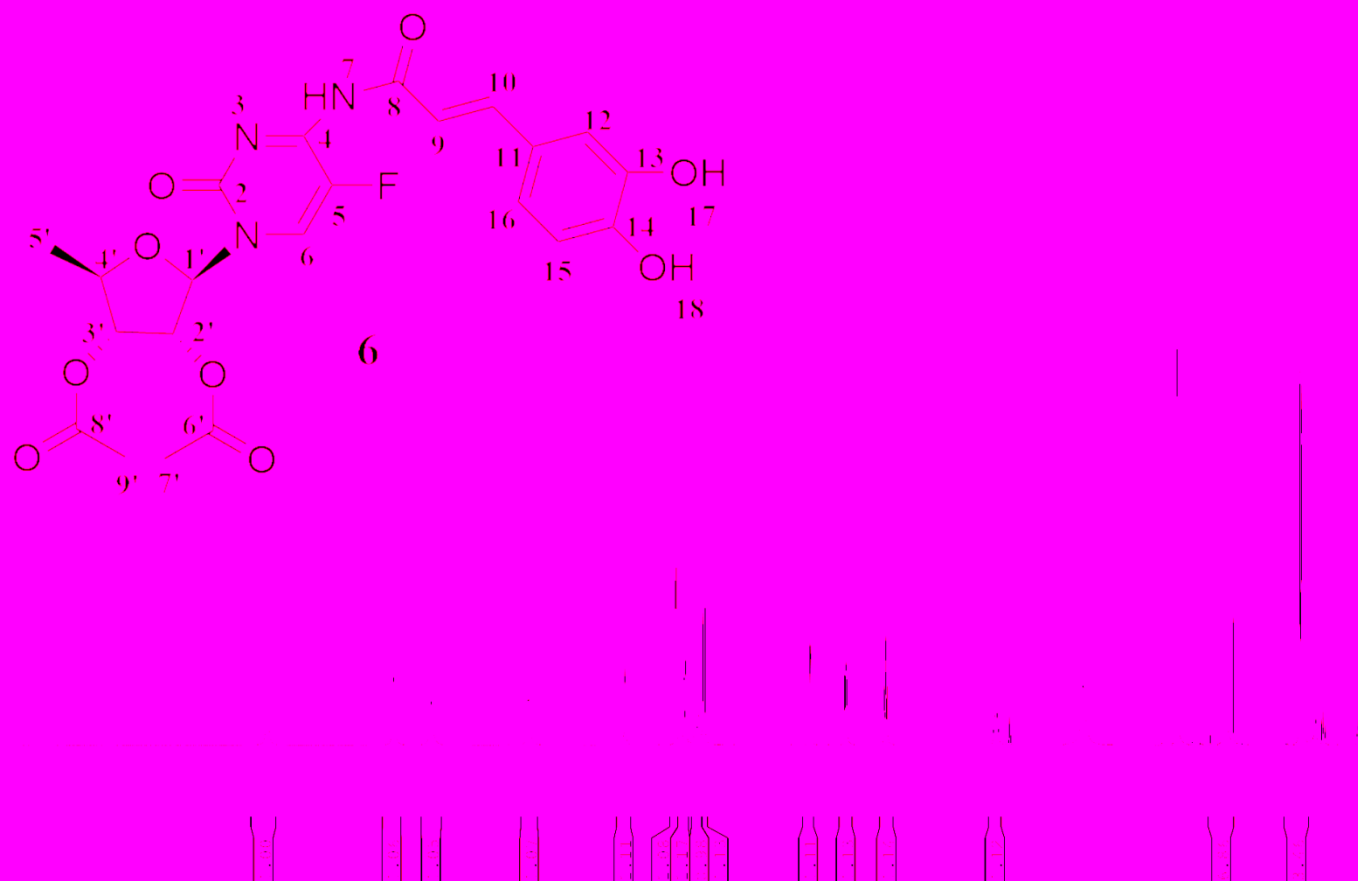

Figure S21.  $^1\text{H}$  NMR spectrum of compound 6 ( $\text{DMSO}-d_6$ )

BRUKER

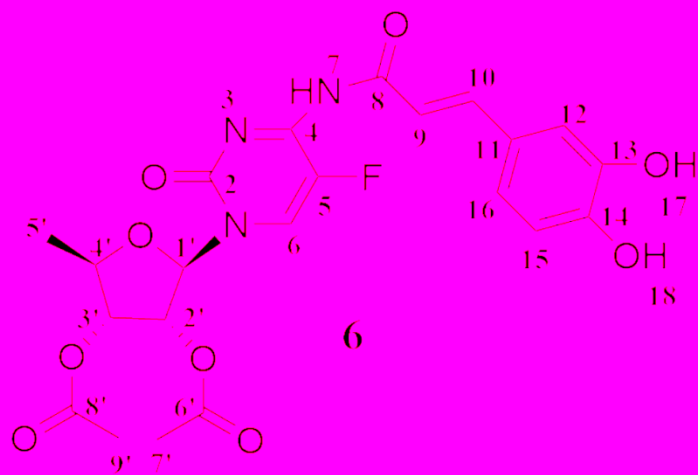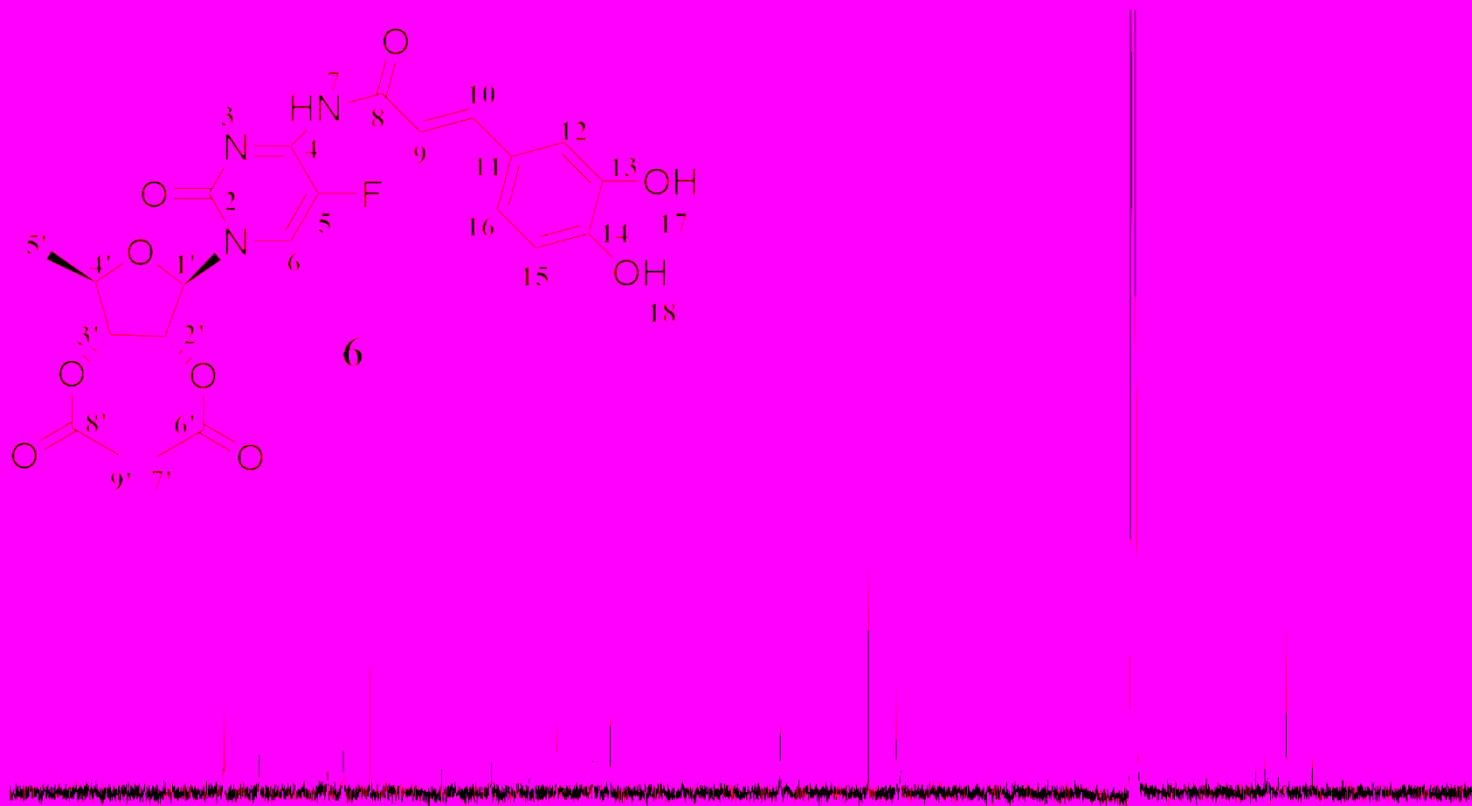

Figure S22. <sup>13</sup>C NMR spectrum of compound 6 (DMSO-*d*<sub>6</sub>)

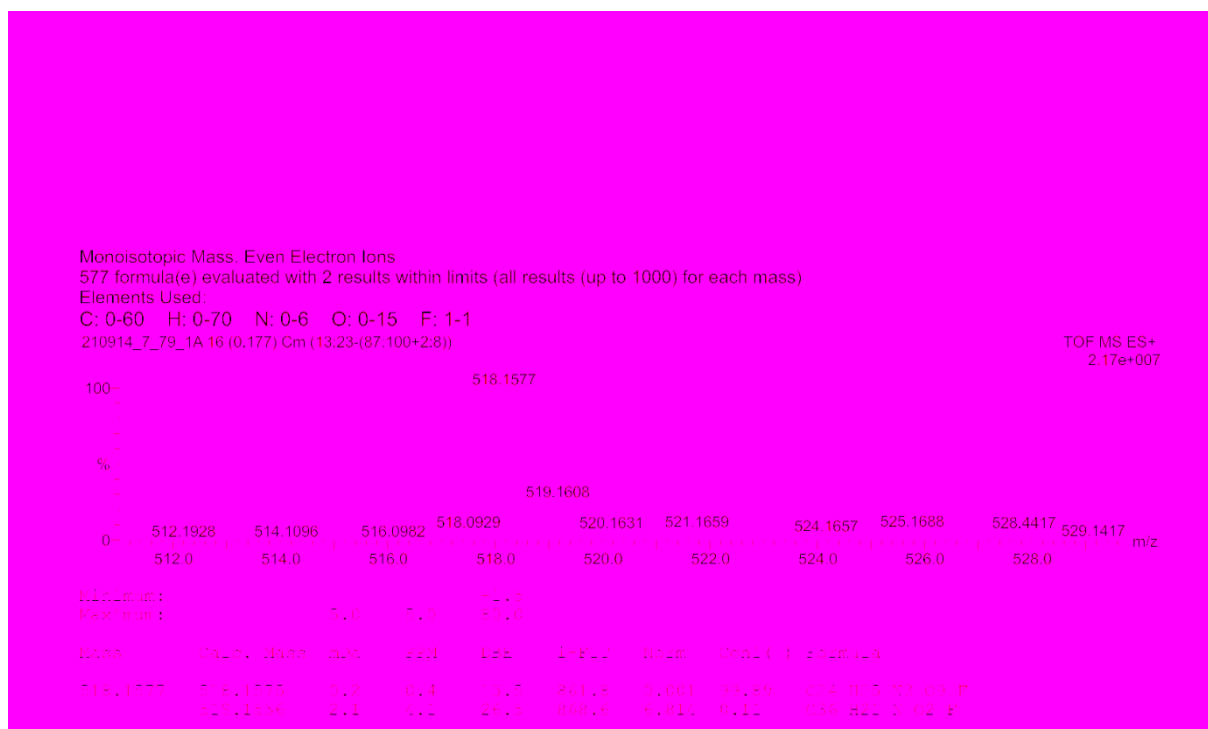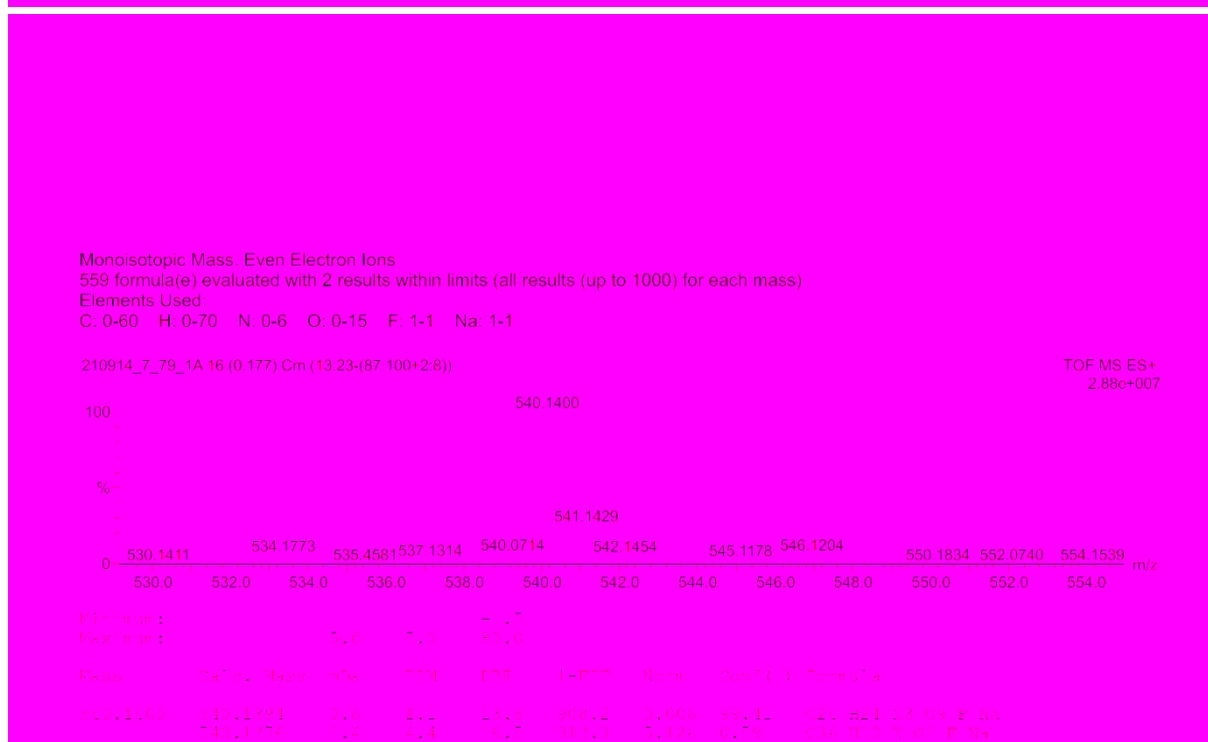

Figure S23. HRMS data of compound 1

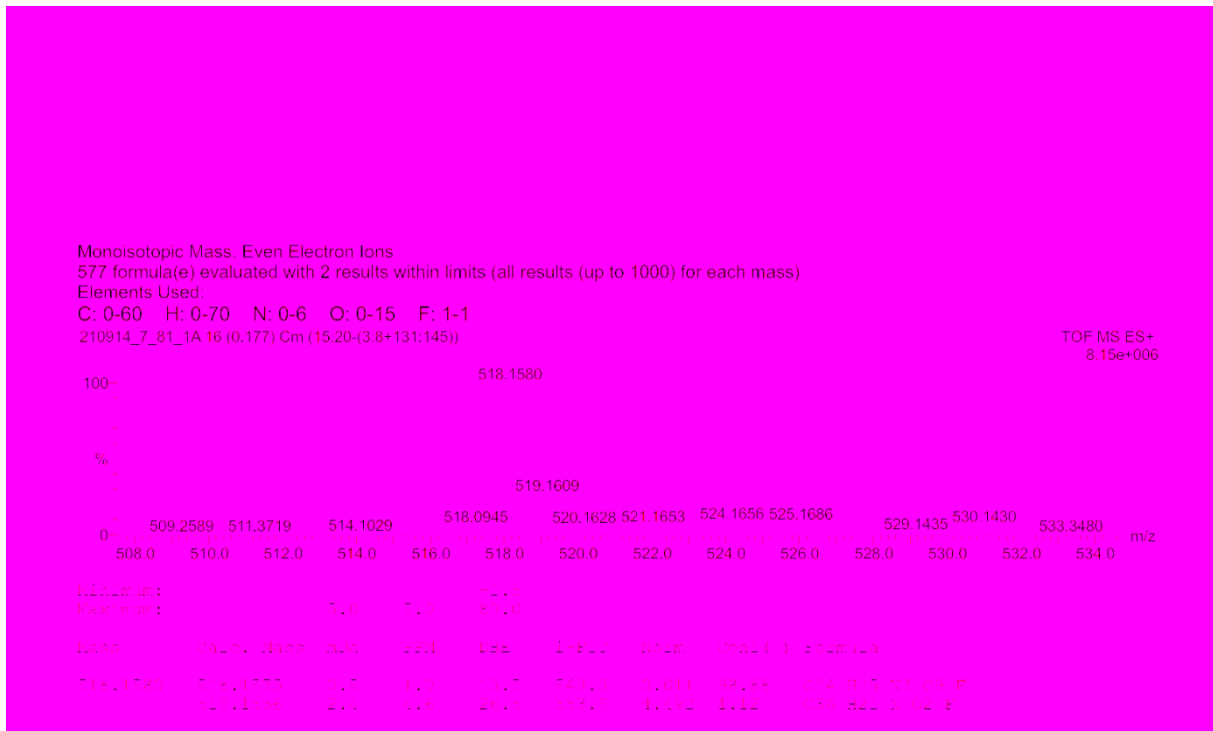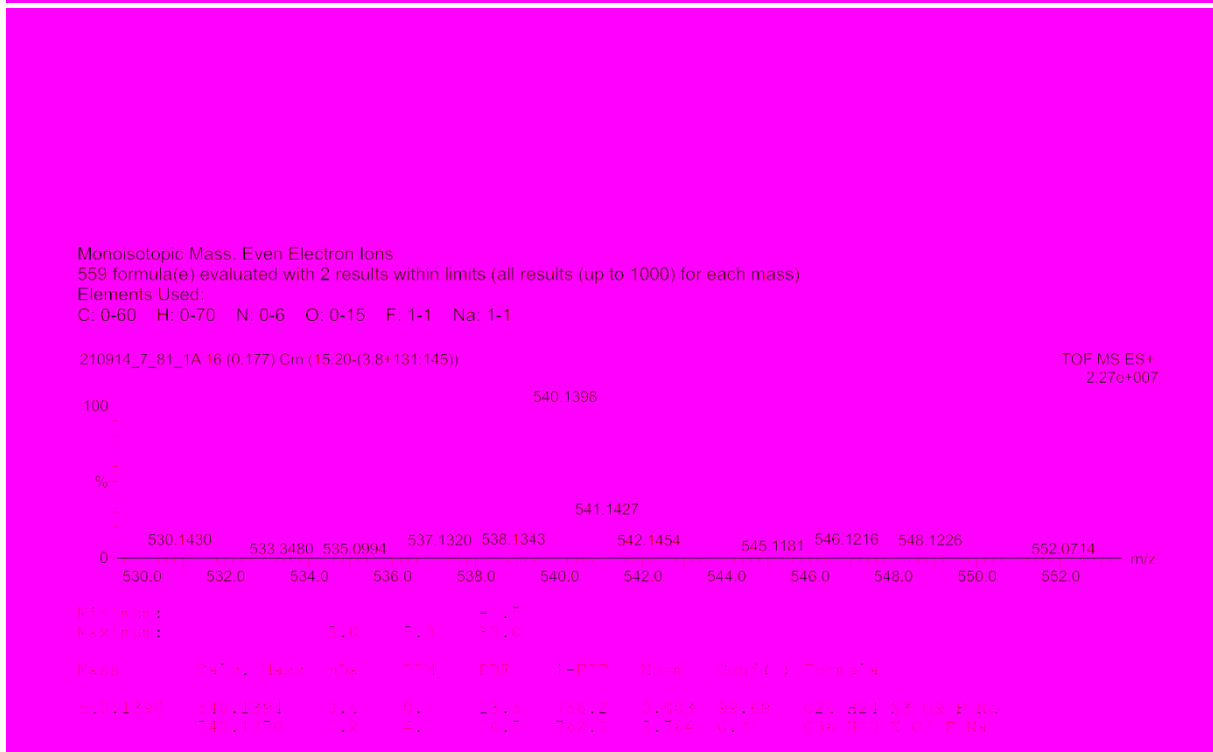

Figure S24. HRMS data of compound 2

Monoisotopic Mass, Even Electron Ions

577 formula(e) evaluated with 2 results within limits (all results (up to 1000) for each mass)

Elements Used:

C: 0-60 H: 0-70 N: 0-6 O: 0-15 F: 1-1

210914\_7\_64\_1A 16 (0.177) Cm (15.23-(1.7+142:150))

TOF MS ES+  
1.14e+007

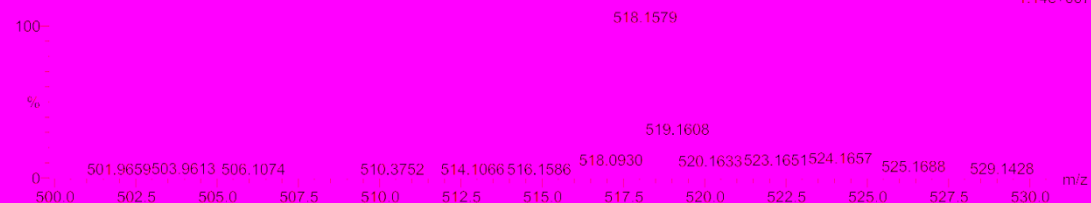

Minimum:

Maximum:

Mass

Calc. Mass

Diff

PPM

Obs

1-PPM

Name

Conf(%)

Formula

518.1579

518.1579

0.4

0.8

13.7

900.7

0.014

99.96

C24 H25 N3 O5 F

519.1608

519.1608

2.7

5.4

26.3

903.0

1.312

1.31

C25 H27 N3 O5 F

Monoisotopic Mass, Even Electron Ions

559 formula(e) evaluated with 2 results within limits (all results (up to 1000) for each mass)

Elements Used:

C: 0-60 H: 0-70 N: 0-6 O: 0-15 F: 1-1 Na: 1-1

210914\_7\_64\_1A 16 (0.177) Cm (15.23-(1.7+142:150))

TOF MS ES+  
2.89e+007

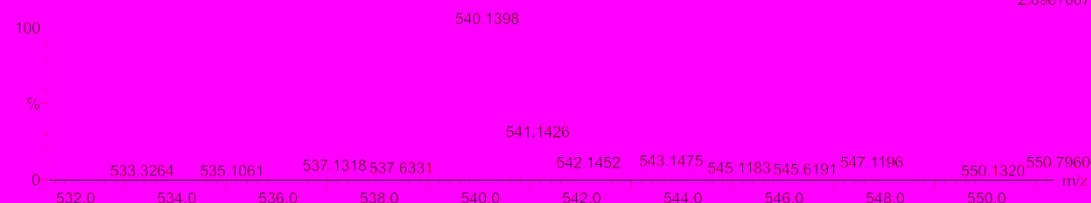

Minimum:

Maximum:

Mass

Calc. Mass

Diff

PPM

Obs

1-PPM

Name

Conf(%)

Formula

540.1398

540.1394

0.4

0.8

13.7

1122.3

0.002

99.91

C24 H24 N3 O5 F Na

541.1426

541.1426

1.2

2.1

26.7

1223.7

0.298

0.19

C25 H24 N3 O5 F Na

Figure S25. HRMS data of compound 3

Monoisotopic Mass, Even Electron Ions

624 formula(e) evaluated with 3 results within limits (all results (up to 1000) for each mass)

Elements Used:

C: 0-60 H: 0-70 N: 0-6 O: 0-15 F: 1-1

210914\_7\_82\_2A 16 (0.177) Cm (14.22-(3.6+169:194))

TOF MS ES+  
1.35e+007

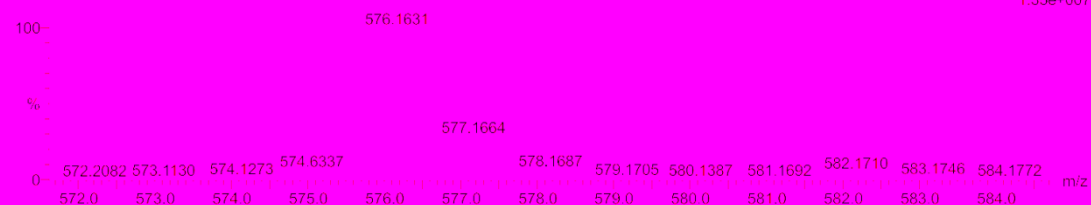

Minimum:

Maximum:

| Mass     | Calc. Mass | Diff | DBE | Ring | 1-DBE | NSM   | Count | Formula                                                         |
|----------|------------|------|-----|------|-------|-------|-------|-----------------------------------------------------------------|
| 576.1631 | 576.1631   | 0.0  | 0.0 | 0.0  | 0.0   | 0.0   | 1     | C <sub>18</sub> H <sub>17</sub> N <sub>3</sub> O <sub>4</sub> F |
|          | 576.1624   | 0.7  | 1.2 | 2.5  | 13.2  | 3.330 | 3.22  | C <sub>18</sub> H <sub>18</sub> N <sub>3</sub> F                |
|          | 576.16     | 1.0  | 1.5 | 2.7  | 13.0  | 3.787 | 3.17  | C <sub>18</sub> H <sub>19</sub> N <sub>3</sub> O <sub>4</sub> F |

Monoisotopic Mass, Even Electron Ions

616 formula(e) evaluated with 3 results within limits (all results (up to 1000) for each mass)

Elements Used:

C: 0-60 H: 0-70 N: 0-6 O: 0-15 F: 1-1 Na: 1-1

210914\_7\_82\_2A 16 (0.177) Cm (14.22-(3.6+169:194))

TOF MS ES+  
2.83e+007

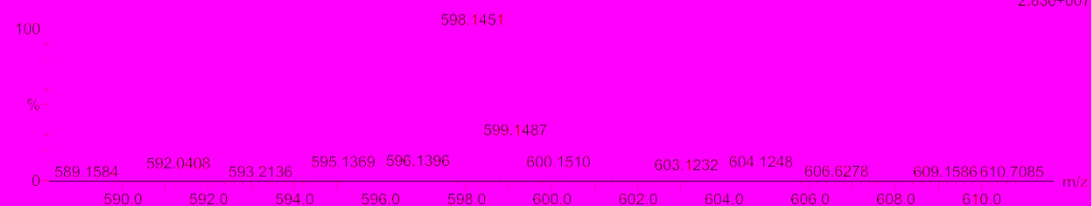

Minimum:

Maximum:

| Mass     | Calc. Mass | Diff | DBE | Ring | 1-DBE | NSM   | Count | Formula                                                           |
|----------|------------|------|-----|------|-------|-------|-------|-------------------------------------------------------------------|
| 598.1451 | 598.1449   | 0.2  | 0.3 | 1.0  | 9.2   | 0.000 | 33.14 | C <sub>20</sub> H <sub>20</sub> N <sub>3</sub> O <sub>4</sub> FNa |
|          | 598.1444   | 0.7  | 1.0 | 2.0  | 8.0   | 0.712 | 2.44  | C <sub>19</sub> H <sub>18</sub> N <sub>3</sub> O <sub>4</sub> Na  |
|          | 598.1437   | 1.0  | 1.3 | 2.7  | 7.4   | 0.268 | 2.87  | C <sub>18</sub> H <sub>19</sub> N <sub>3</sub> O <sub>4</sub> Na  |

Figure S26. HRMS data of compound 4

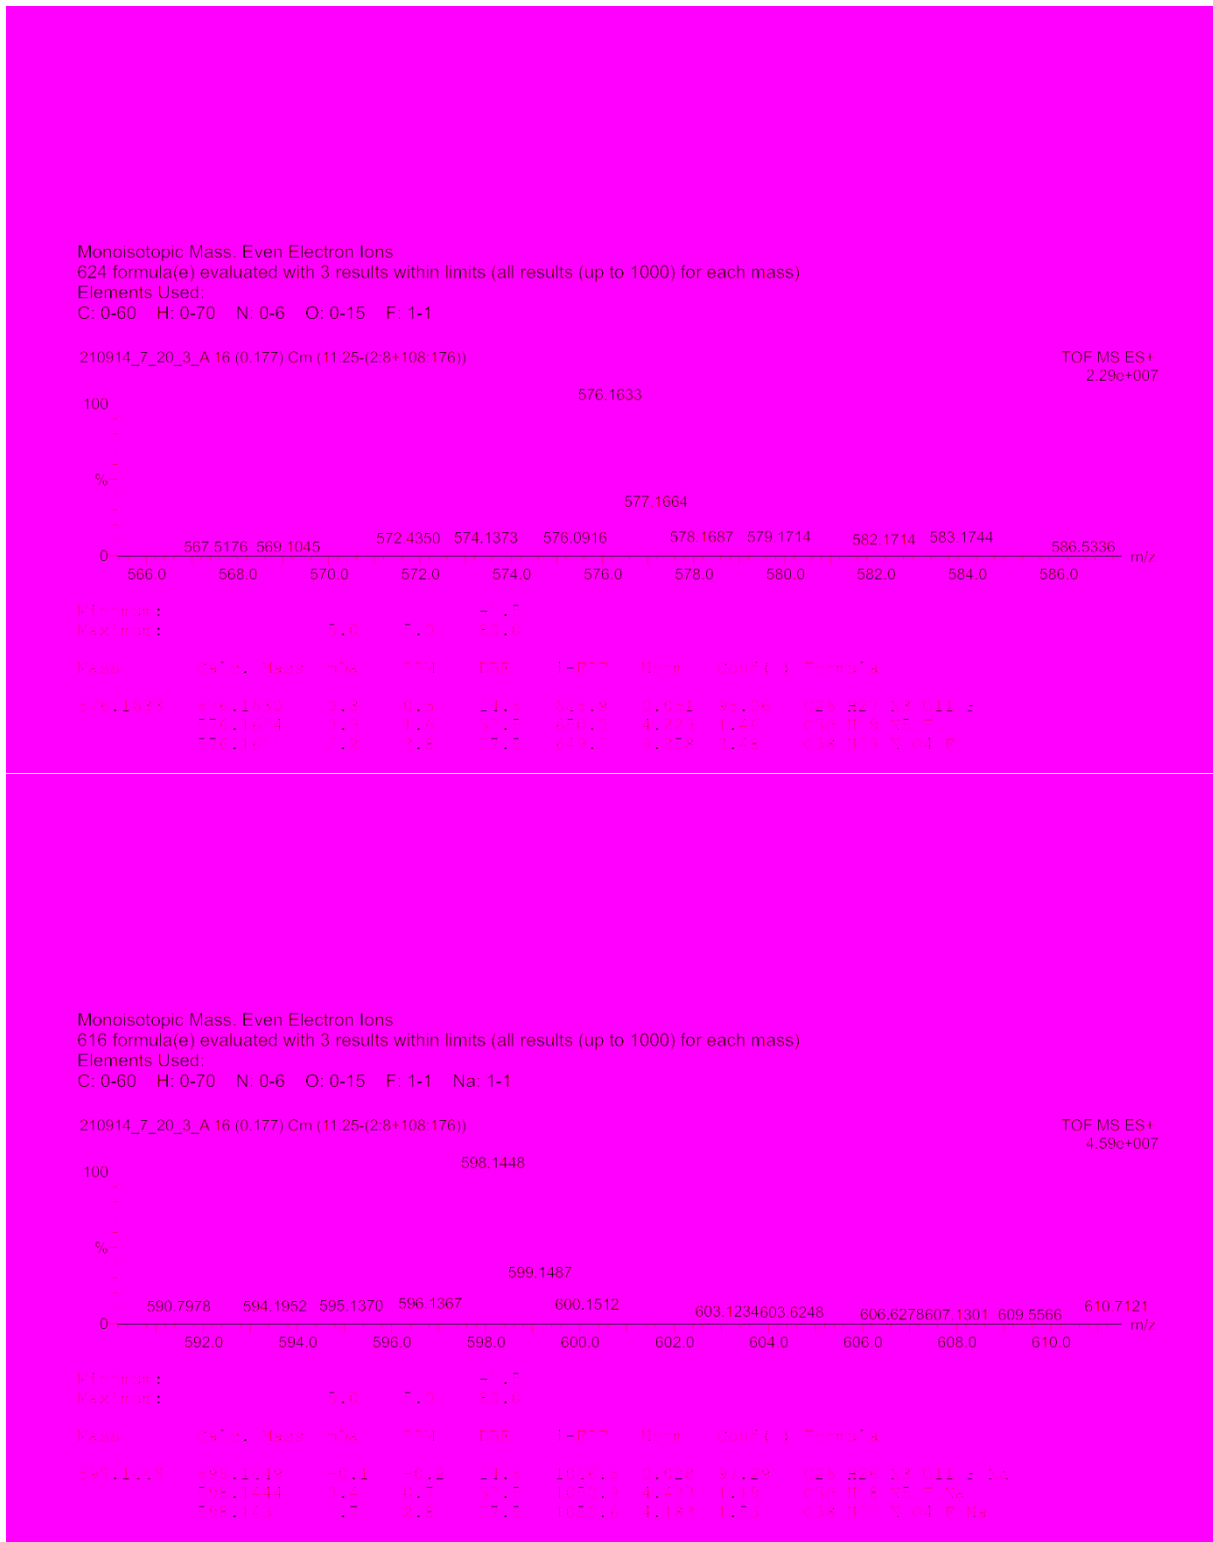

Monoisotopic Mass, Even Electron Ions

545 formula(e) evaluated with 2 results within limits (all results (up to 1000) for each mass)

Elements Used:

C: 0-60 H: 0-70 N: 0-6 O: 0-15 F: 1-1

210914\_7\_31\_2A 16 (0.177) Cm (13.24-(4.8+43.50))

TOF MS ES+  
4.50e+006

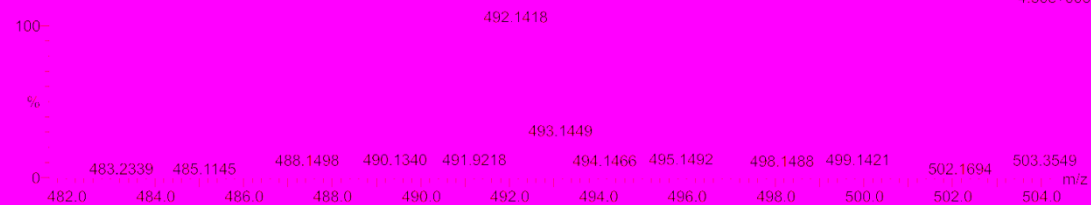

Minimum:  
Maximum:

| Mass     | Calc. Mass | Diff | DBE | 1-DBE | NSM    | Conf. (1) | Formula                                                         |
|----------|------------|------|-----|-------|--------|-----------|-----------------------------------------------------------------|
| 492.1418 | 492.1418   | 0.0  | 0.0 | 0.0   | 1403.0 | 0.007     | C <sub>22</sub> H <sub>22</sub> N <sub>2</sub> O <sub>2</sub> F |
|          | 492.1449   | 0.0  | 0.0 | 0.0   | 1403.0 | 0.007     | C <sub>22</sub> H <sub>22</sub> N <sub>2</sub> O <sub>2</sub> F |

Monoisotopic Mass, Even Electron Ions

531 formula(e) evaluated with 2 results within limits (all results (up to 1000) for each mass)

Elements Used:

C: 0-60 H: 0-70 N: 0-6 O: 0-15 F: 1-1 Na: 1-1

210914\_7\_31\_2 16 (0.177) Cm (13.24-(4.8+43.50))

1: TOF MS ES+  
7.84e+006

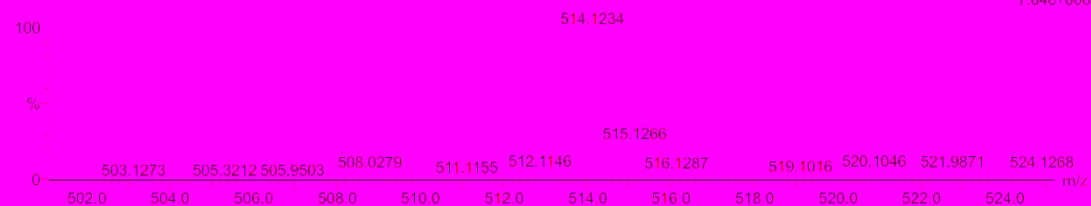

Minimum:  
Maximum:

| Mass     | Calc. Mass | Diff | DBE  | 1-DBE | NSM    | Conf. (1) | Formula                                                           |
|----------|------------|------|------|-------|--------|-----------|-------------------------------------------------------------------|
| 511.1154 | 511.1155   | -0.1 | -0.0 | 0.0   | 1438.0 | 0.011     | C <sub>22</sub> H <sub>22</sub> N <sub>2</sub> O <sub>2</sub> FNa |
|          | 514.1234   | 0.0  | 0.0  | 0.0   | 2424.0 | 0.000     | C <sub>22</sub> H <sub>22</sub> N <sub>2</sub> O <sub>2</sub> FNa |

Figure S28. HRMS data of compound 6
